# Supplementary material for: In vitro and in silico studies of alpha glucosidase inhibition and antifungal activity of coffea canephora husk
Source: Royal Society of Chemistry journal article supplement (doi:10.1039/d4ra04405c), 2024-01-01
Supplement: d4ra04405c1.pdf [file d4ra04405c1.pdf]

***IN VITRO AND IN SILICO OF ALPHA GLUCOSIDASE INHIBITION AND  
ANTIFUNGAL ACTIVITY OF COFFEA CANEPHORA HUSK***

**Tran Thi Ngoc Mai<sup>a</sup>, Phan Nhat Minh<sup>b,c</sup>, Nguyen Tan Phat<sup>b,c</sup>, Mai Thanh Chi<sup>b,c</sup>, Dang Chi Hien<sup>b,c</sup>, Van-Kieu Nguyen<sup>d,e</sup>, Thuc Huy Duong<sup>f</sup>, Tran Thanh Nha<sup>g</sup>, Tran Nguyen Minh An<sup>h,\*</sup>, Nguyen Ngoc Huyen Tran<sup>h</sup>, Mai Dinh Tri<sup>b,c,\*</sup>**

<sup>a</sup>Institute of Applied Sciences, HUTECH University, Ho Chi Minh City, Viet Nam, 475A Dien Bien Phu Street, Ward 25, Binh Thanh District, Ho Chi Minh City, Vietnam;

<sup>b</sup>Institute of Chemical Technology, Vietnam Academy of Science and Technology, 1A TL29 Street, Thanh Loc ward, District 12, Ho Chi Minh City, Vietnam

<sup>c</sup>Graduate University of Science and Technology, Vietnam Academy of Science and Technology, 18 Hoang Quoc Viet, Cau Giay, Hanoi, Vietnam; maidinhtri@gmail.com

<sup>d</sup>Institute of Fundamental and Applied Sciences, Duy Tan University, Ho Chi Minh City 700000, Vietnam.

<sup>e</sup>Faculty of Natural Sciences, Duy Tan University, Da Nang, 550000, Vietnam.

<sup>f</sup>Department of Chemistry, Ho Chi Minh City University of Education, 280 An Duong Vuong Street, District 5, 748342, Ho Chi Minh City, Vietnam

<sup>g</sup>Department of Environmental Engineering, Thu Dau Mot University, Binh Duong, Vietnam

<sup>h</sup>Faculty of Chemical Engineering, Industrial University of Ho Chi Minh City, Ho Chi Minh City, 71420, Vietnam; trannguyenminhan@iuh.edu.vn

\*e-mail: maidinhtri@gmail.com, trannguyenminhan@iuh.edu.vn

**SUPPLEMENTARY MATERIAL**

|                |        |              |                             |            |                  |                   |                     |
|----------------|--------|--------------|-----------------------------|------------|------------------|-------------------|---------------------|
| Name           | CF-5   | Rack Pos.    |                             | Instrument | 6545B            | Operator          |                     |
| Inj. Vol. (ul) | 3      | Plate Pos.   |                             | IRM Status | Some ions missed | Acq. Time (Local) | 03/04/2024 10:18:08 |
| Data File      | CF-5.d | Method (Acq) | SCAN 17-03-2023<br>CHUYEN.m | Comment    |                  | AM (UTC+07:00)    |                     |

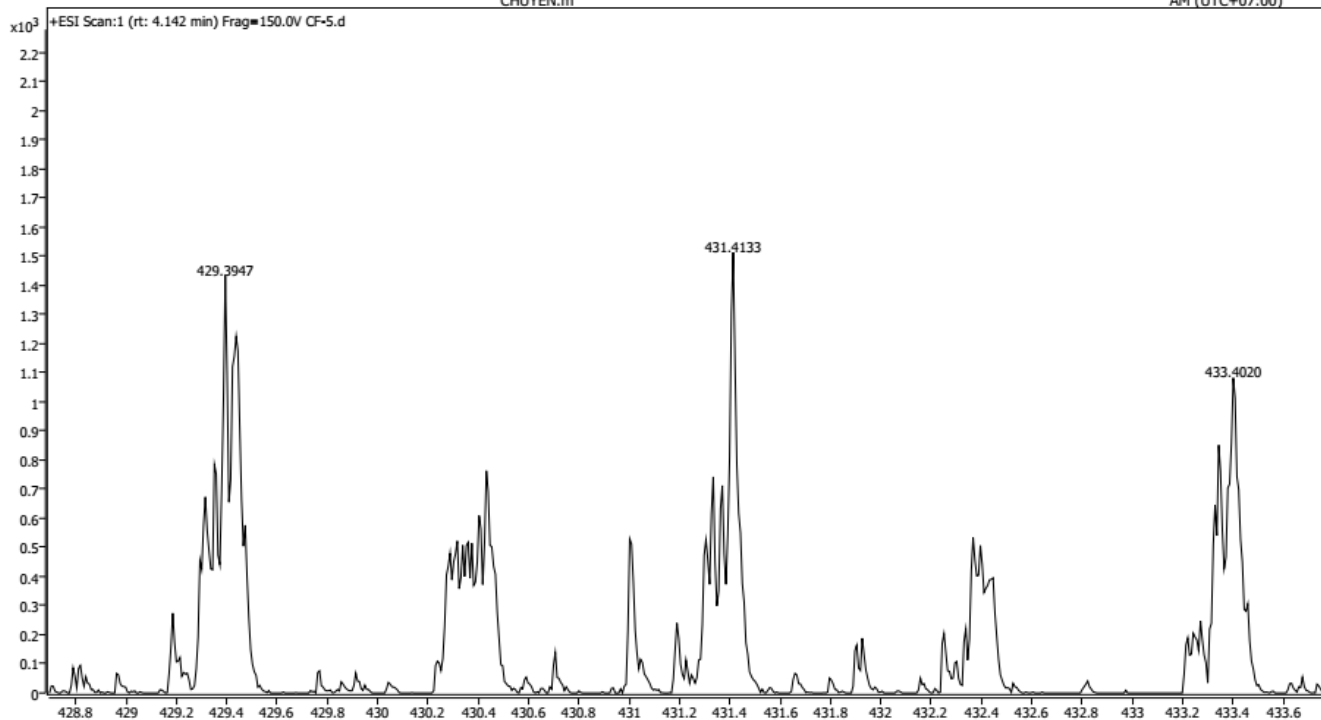

**Figure 1S.** The HR-ESIMS spectrum of **1**

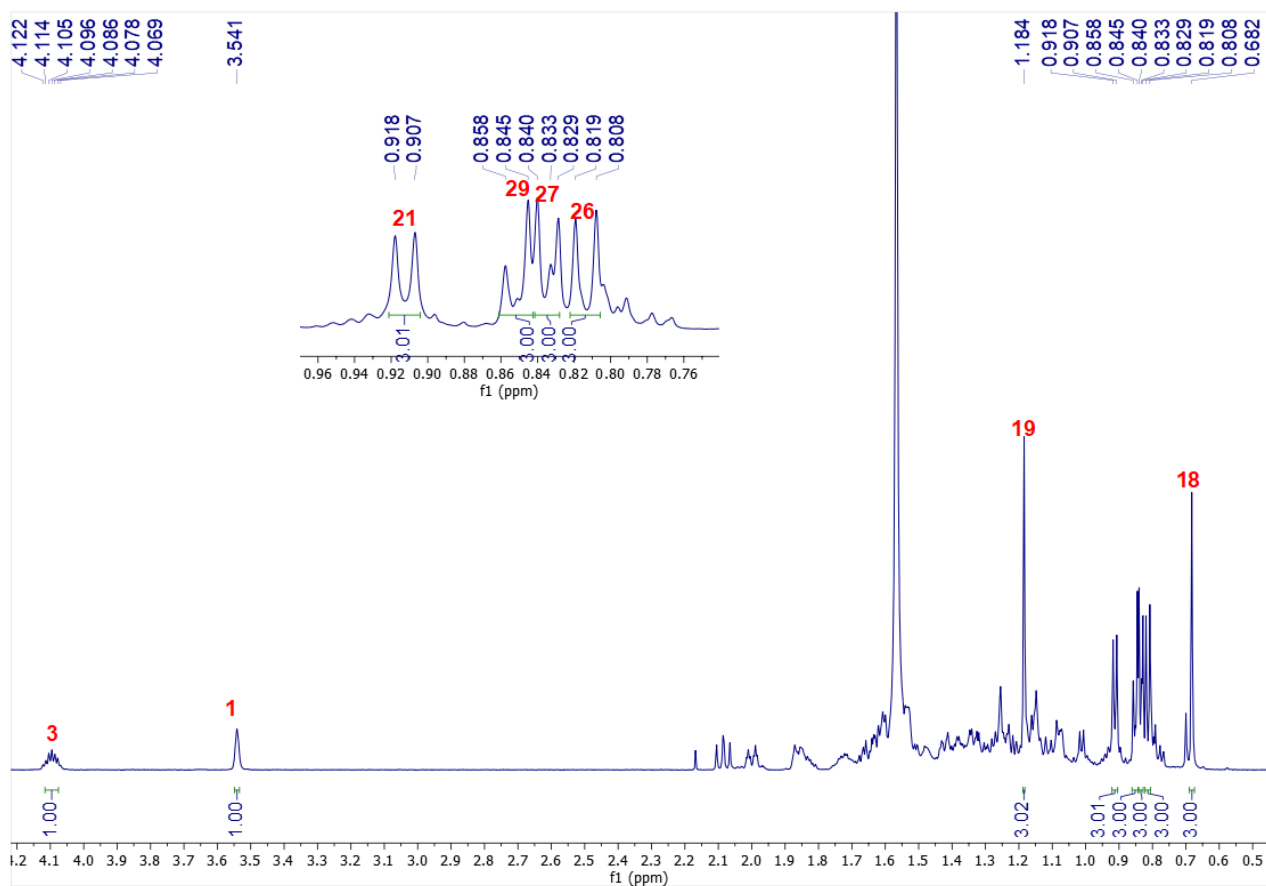

Figure 2S. The  $^1\text{H}$  NMR spectrum of **1** in  $\text{CDCl}_3$

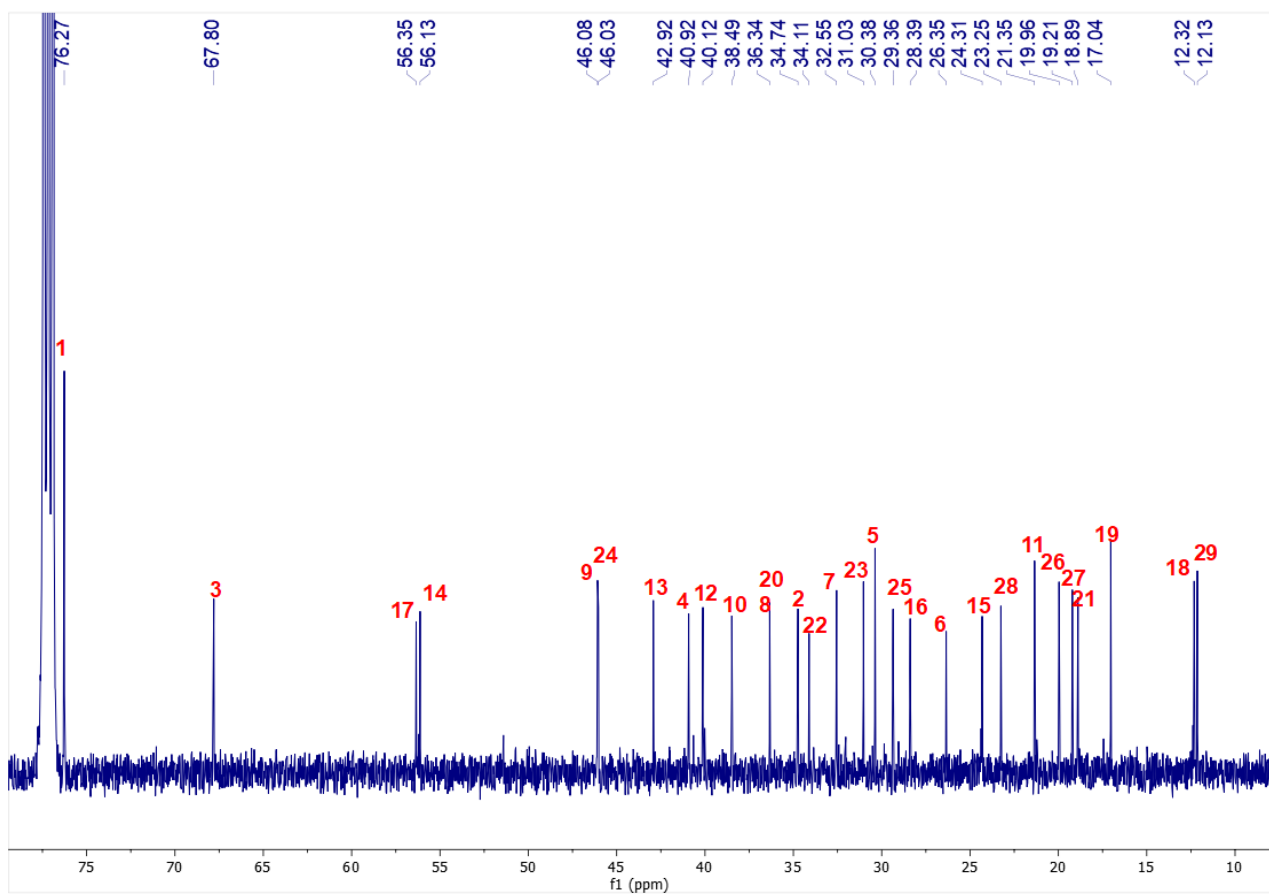

Figure 3S. The  $^{13}\text{C}$  NMR spectrum of **1** in  $\text{CDCl}_3$ .

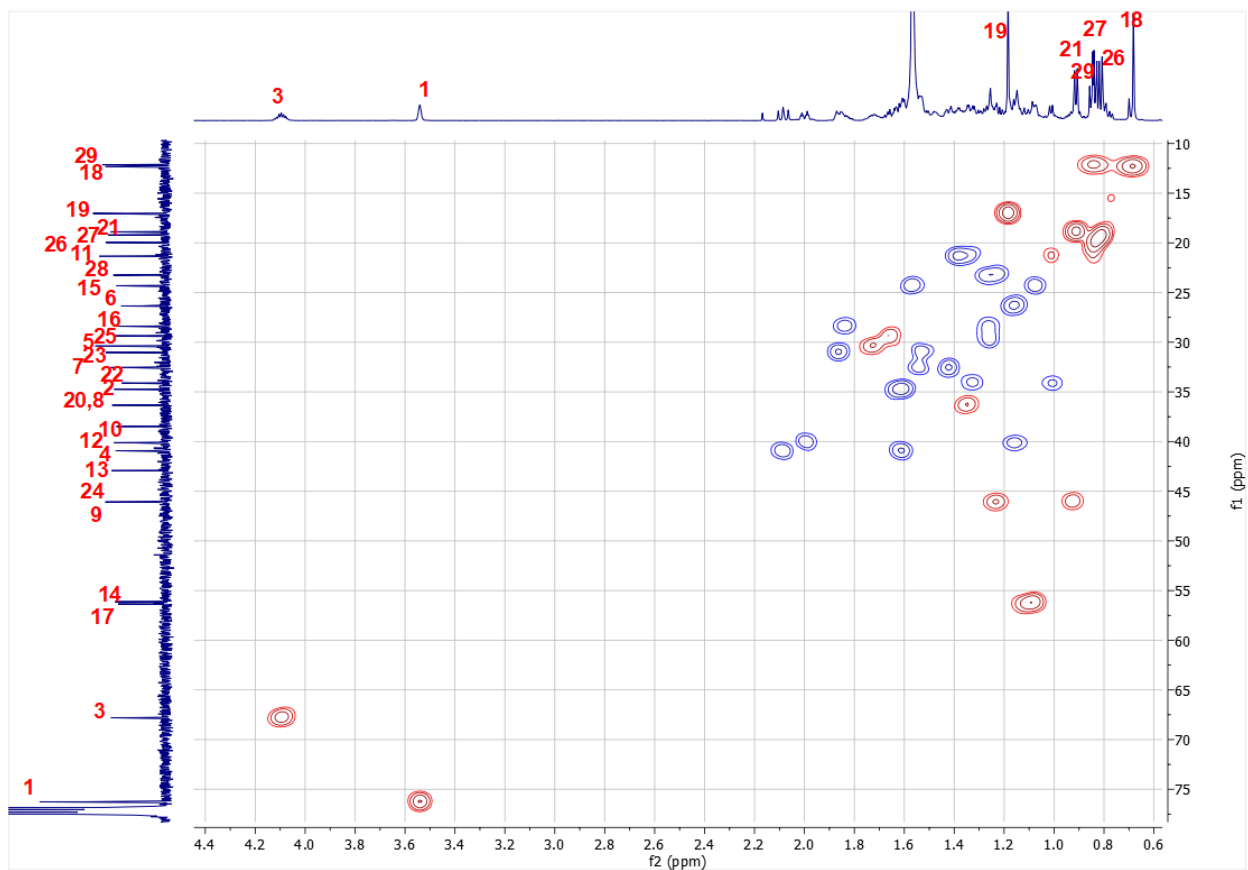

**Figure 4S.** The HSQC spectrum of **1** in  $\text{CDCl}_3$

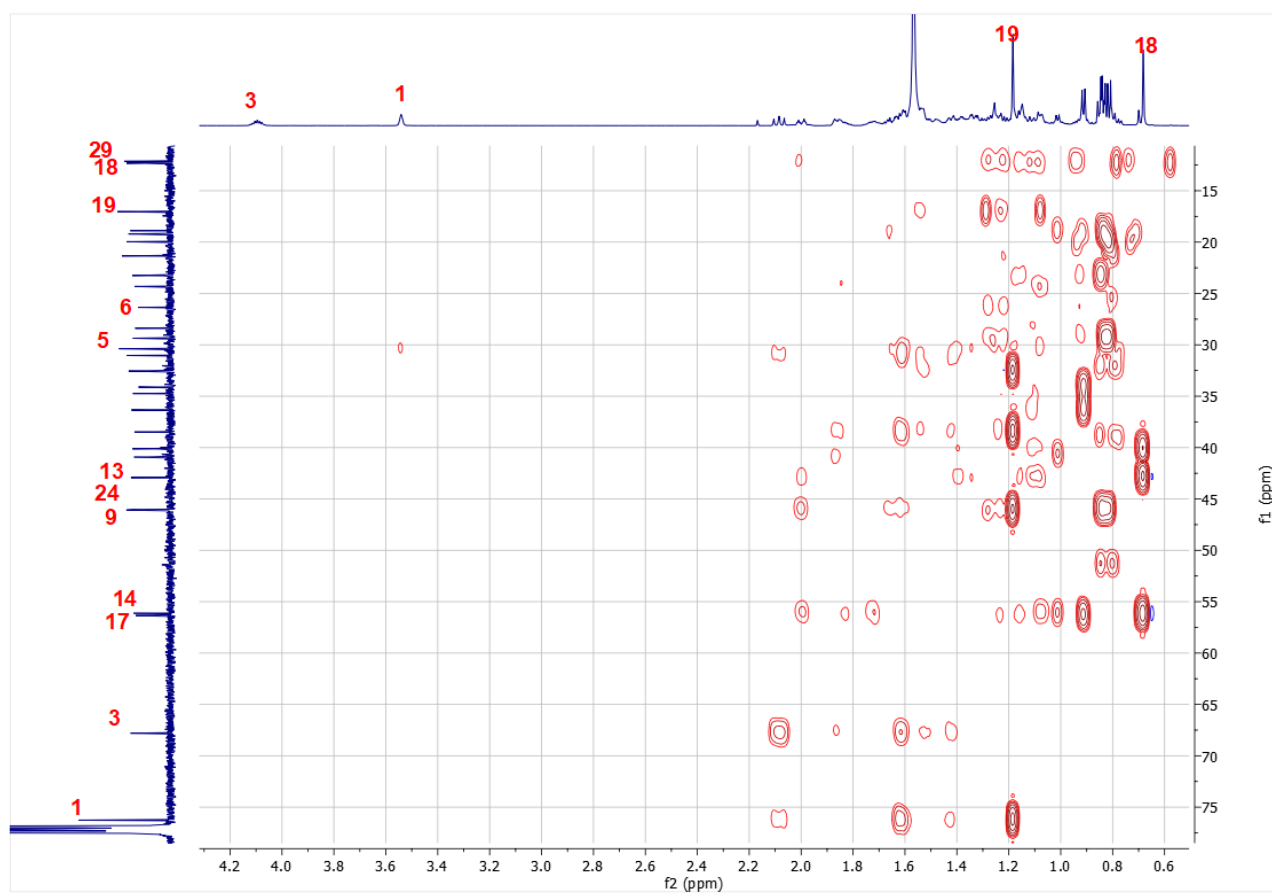

**Figure 5S.** The HMBC spectrum of **1** in  $\text{CDCl}_3$

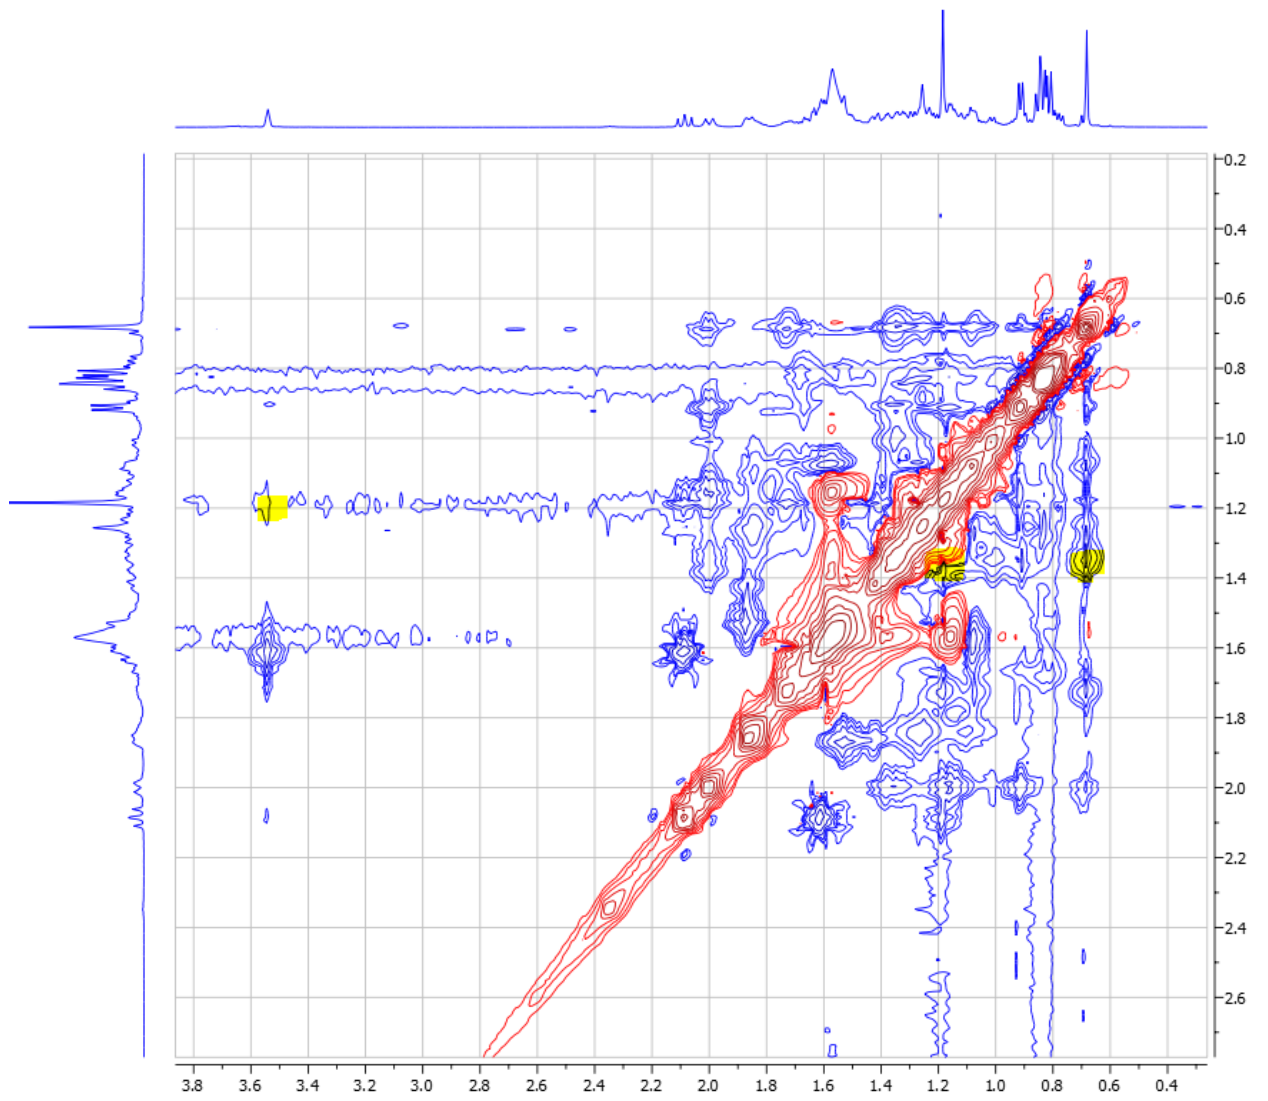

**Figure 6S.** The NOESY spectrum of **1** in CDCl<sub>3</sub>

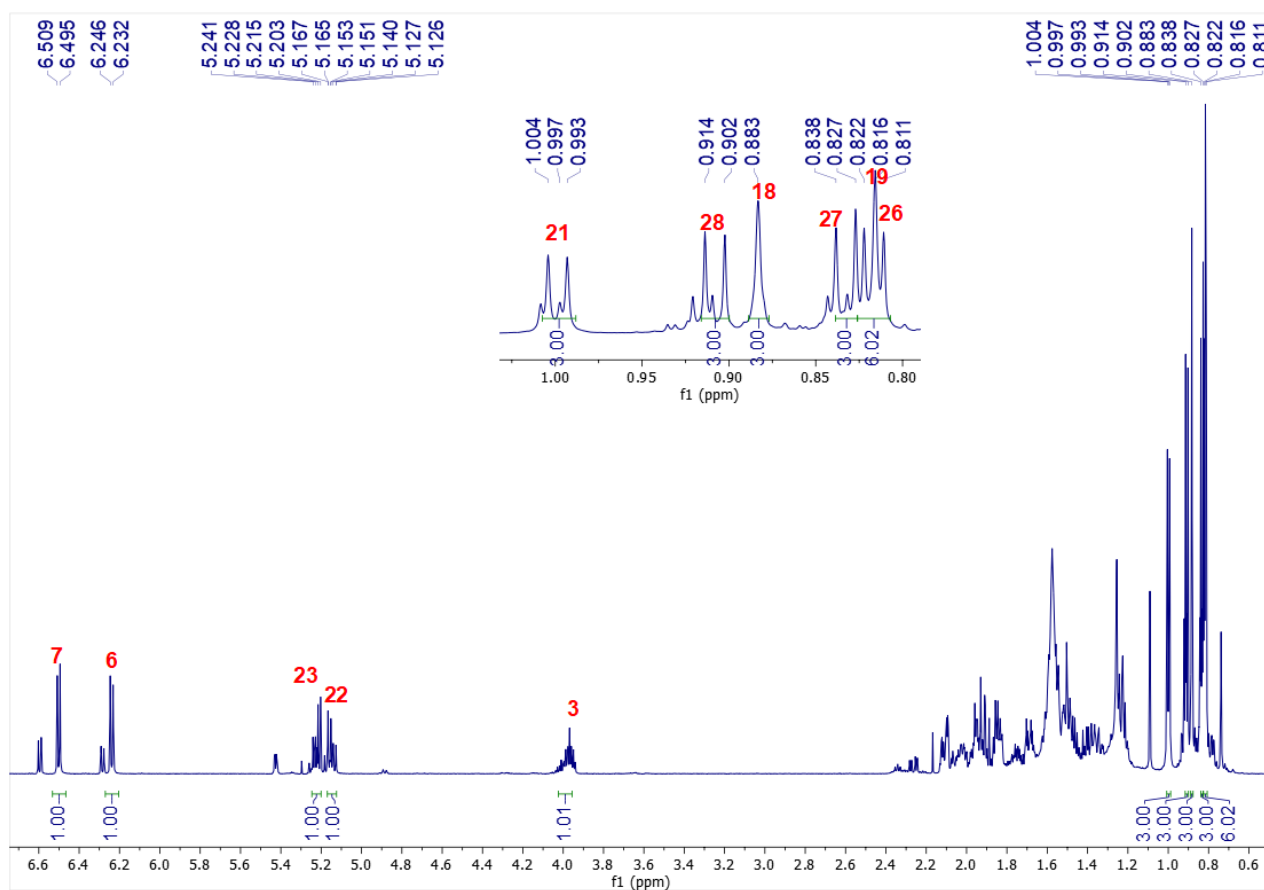

**Figure 7S.** The <sup>1</sup>H NMR spectrum of **2** in CDCl<sub>3</sub>



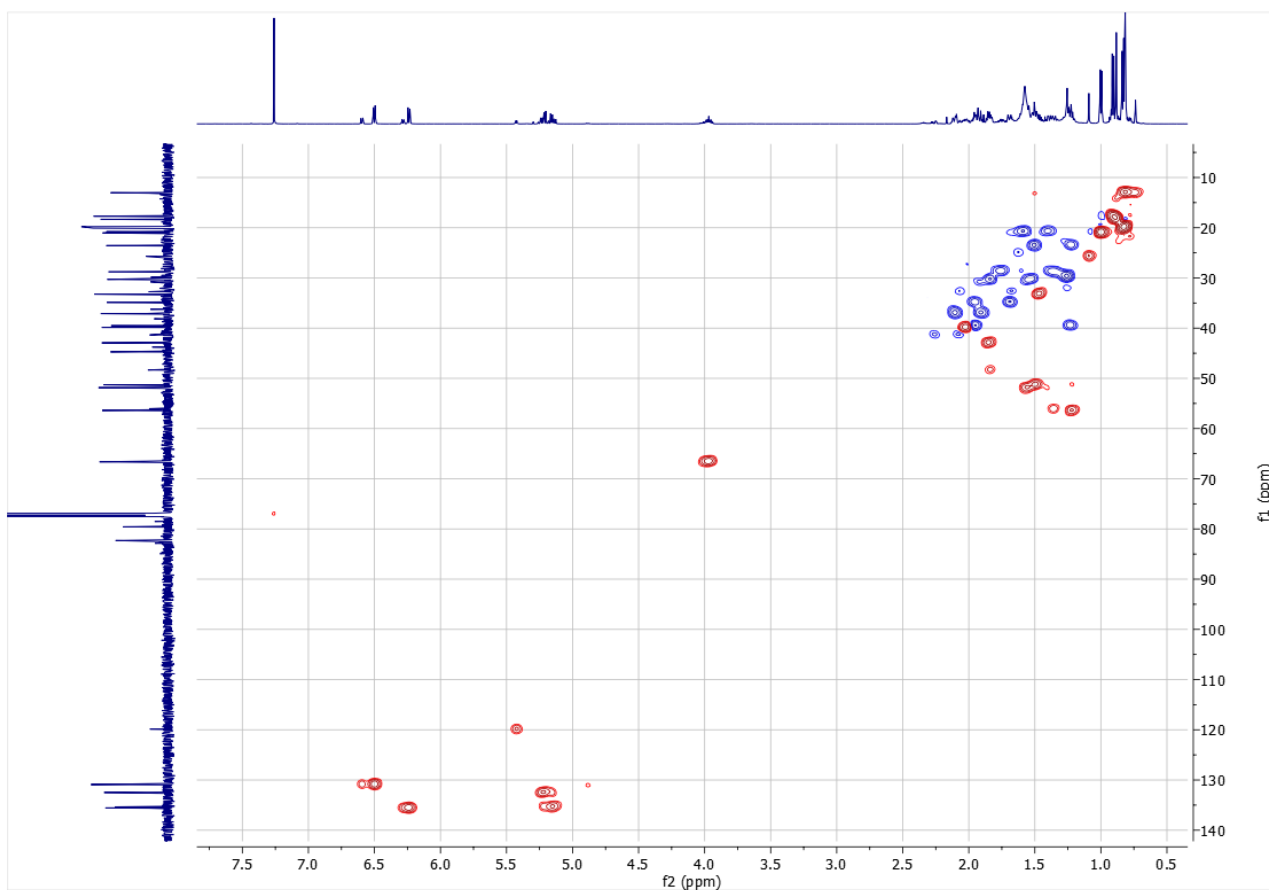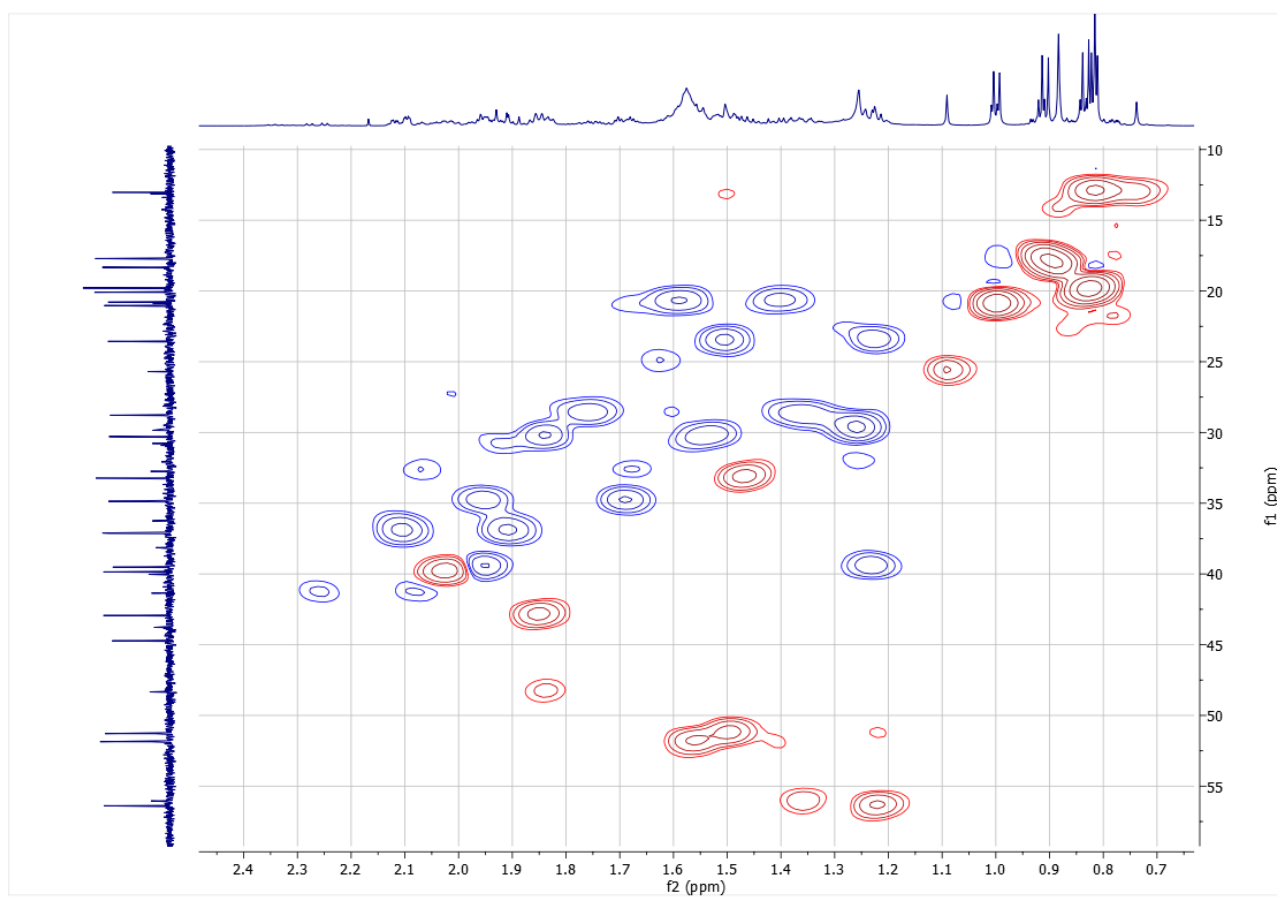

**Figure 9S.** The HSQC spectrum of **2** in  $\text{CDCl}_3$



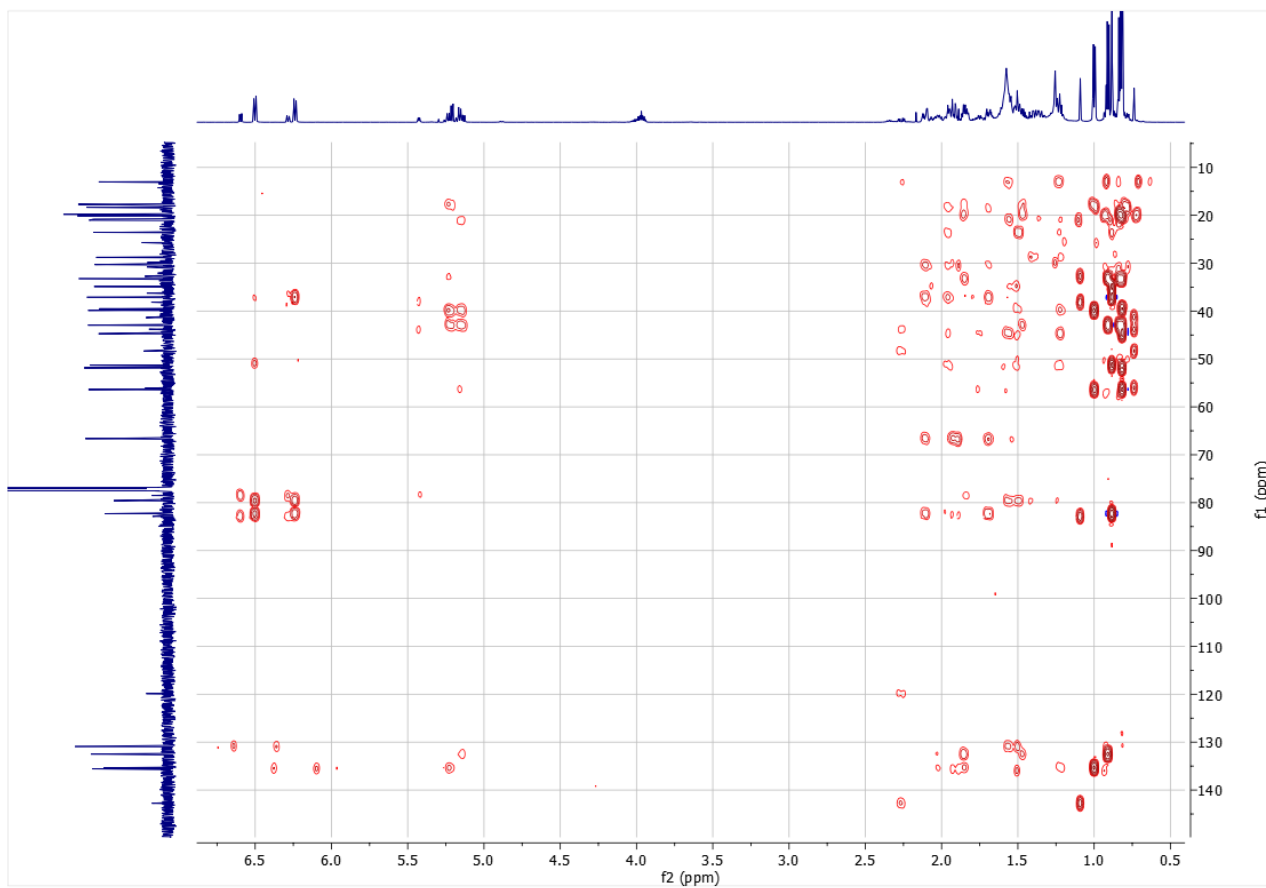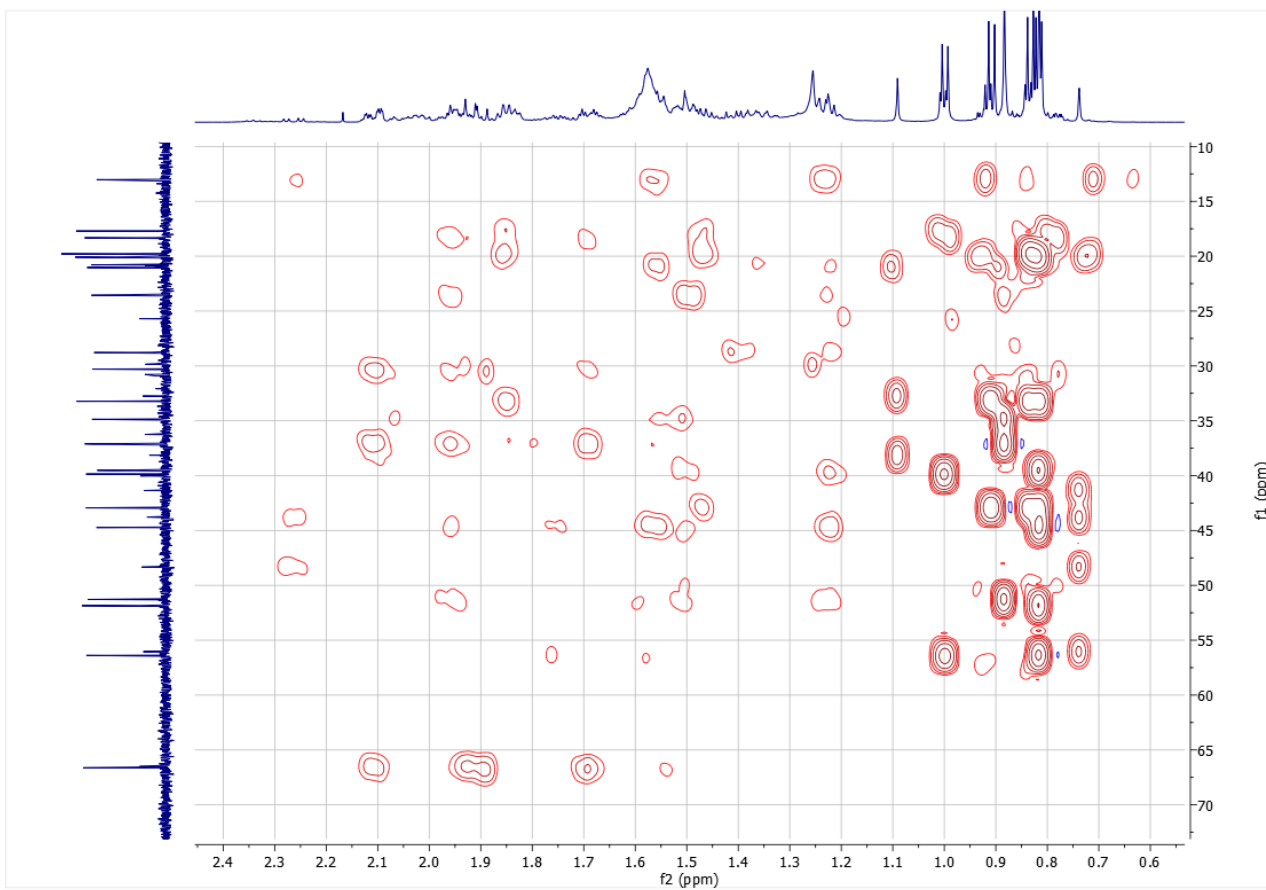

**Figure 10S.** The HMBC spectrum of **2** in CDCl<sub>3</sub>

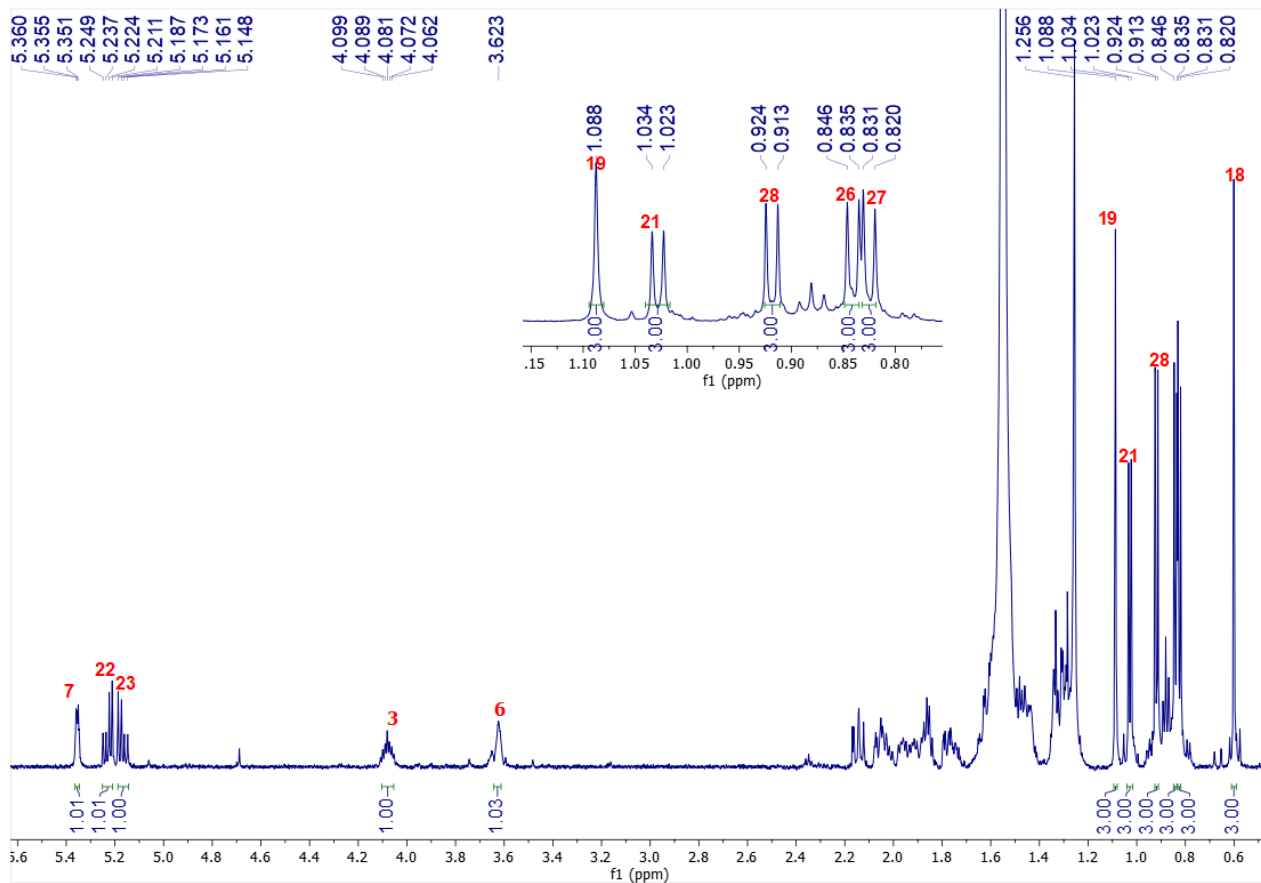

Figure 11S. The  $^1\text{H}$  NMR spectrum of **3** in  $\text{CDCl}_3$

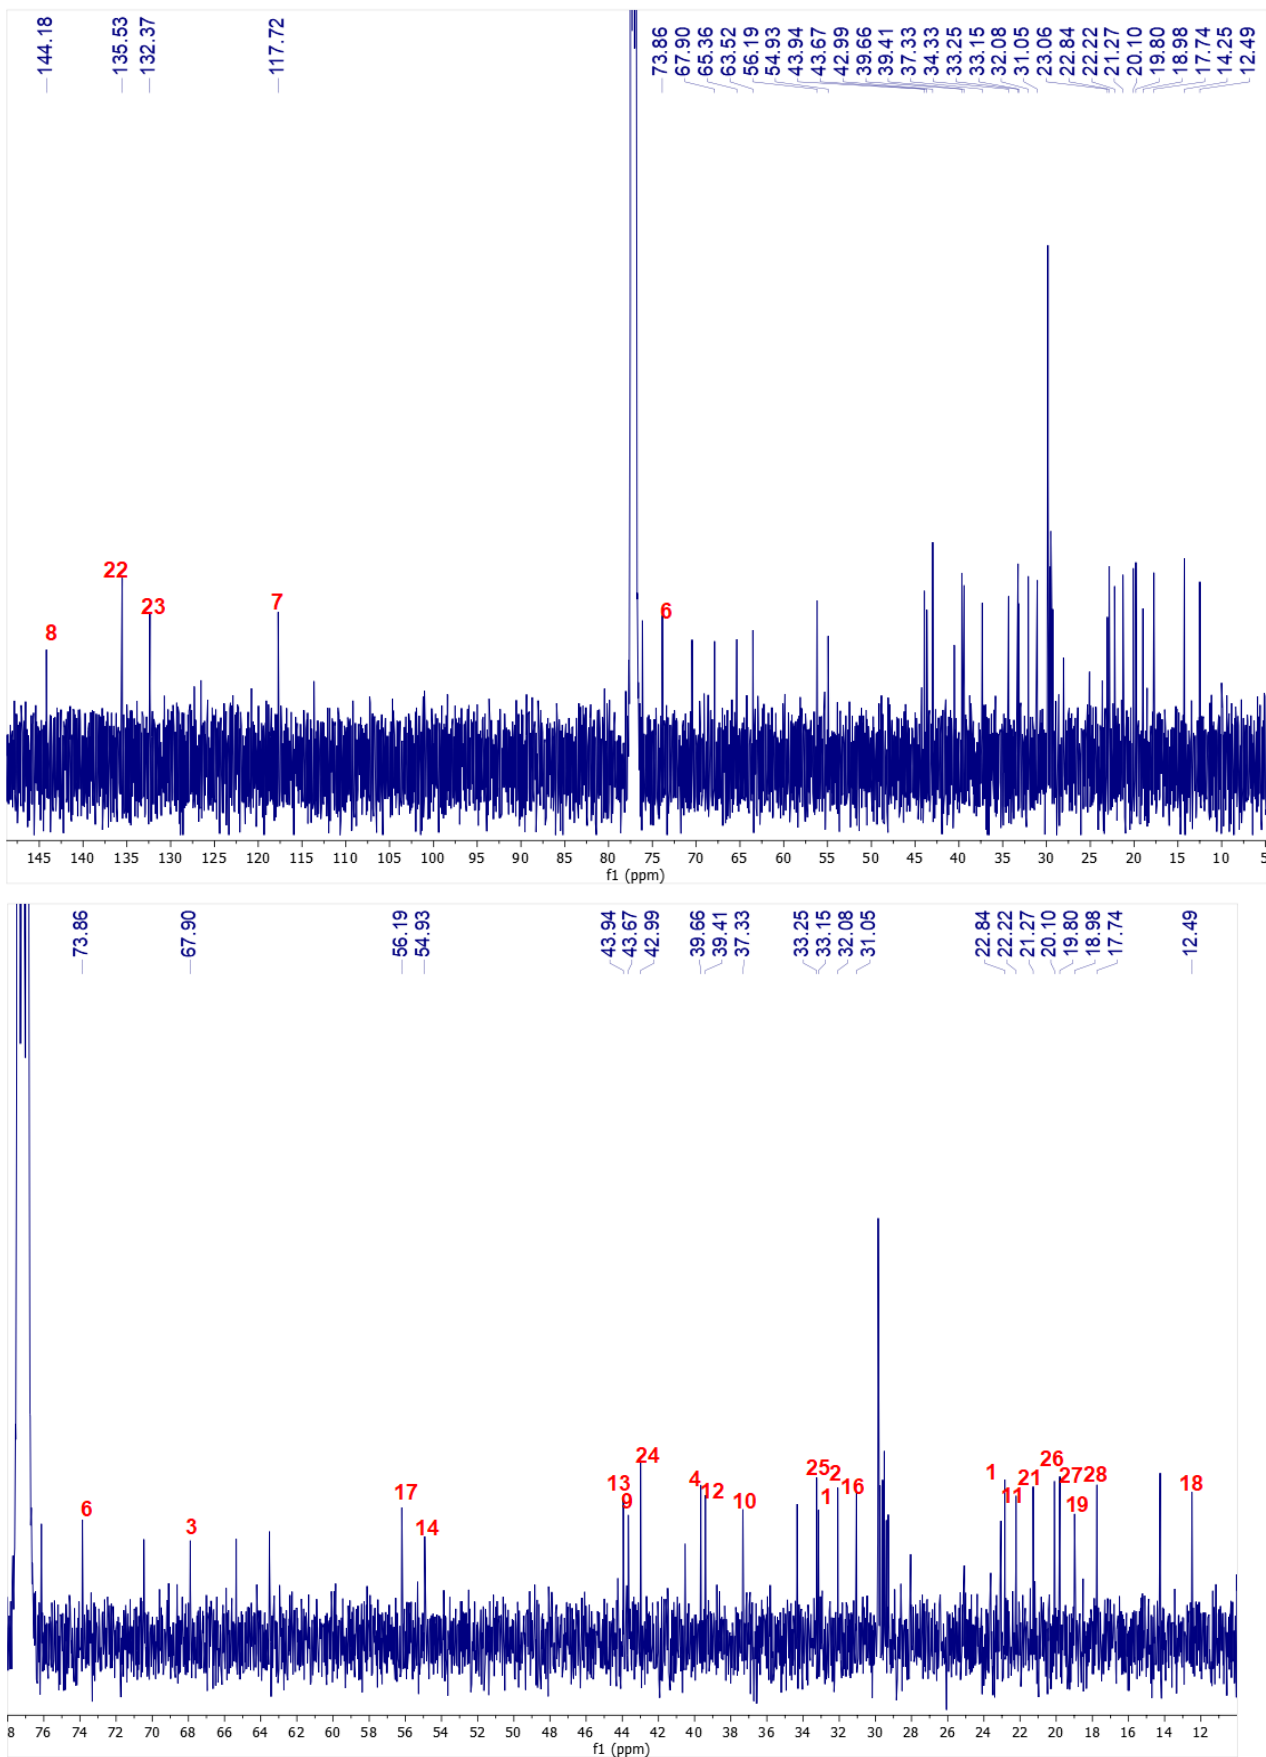

**Figure 12S.** The  $^{13}\text{C}$  NMR spectrum of **3** in  $\text{CDCl}_3$

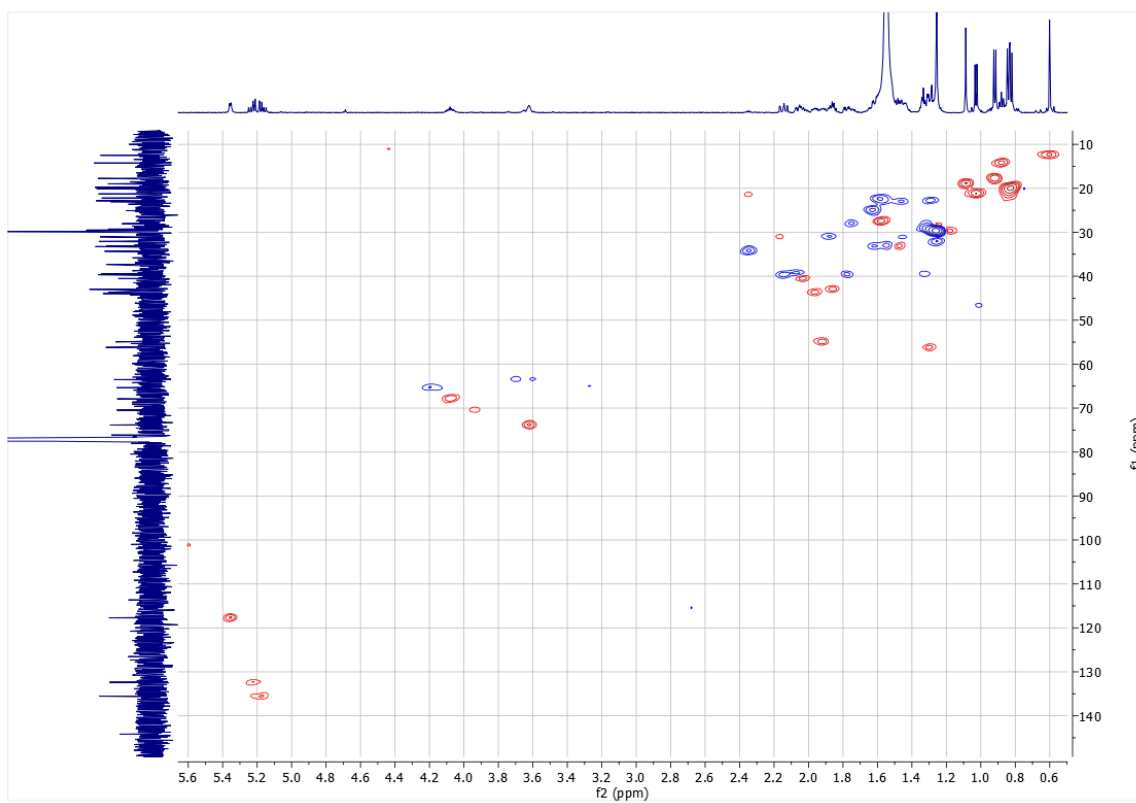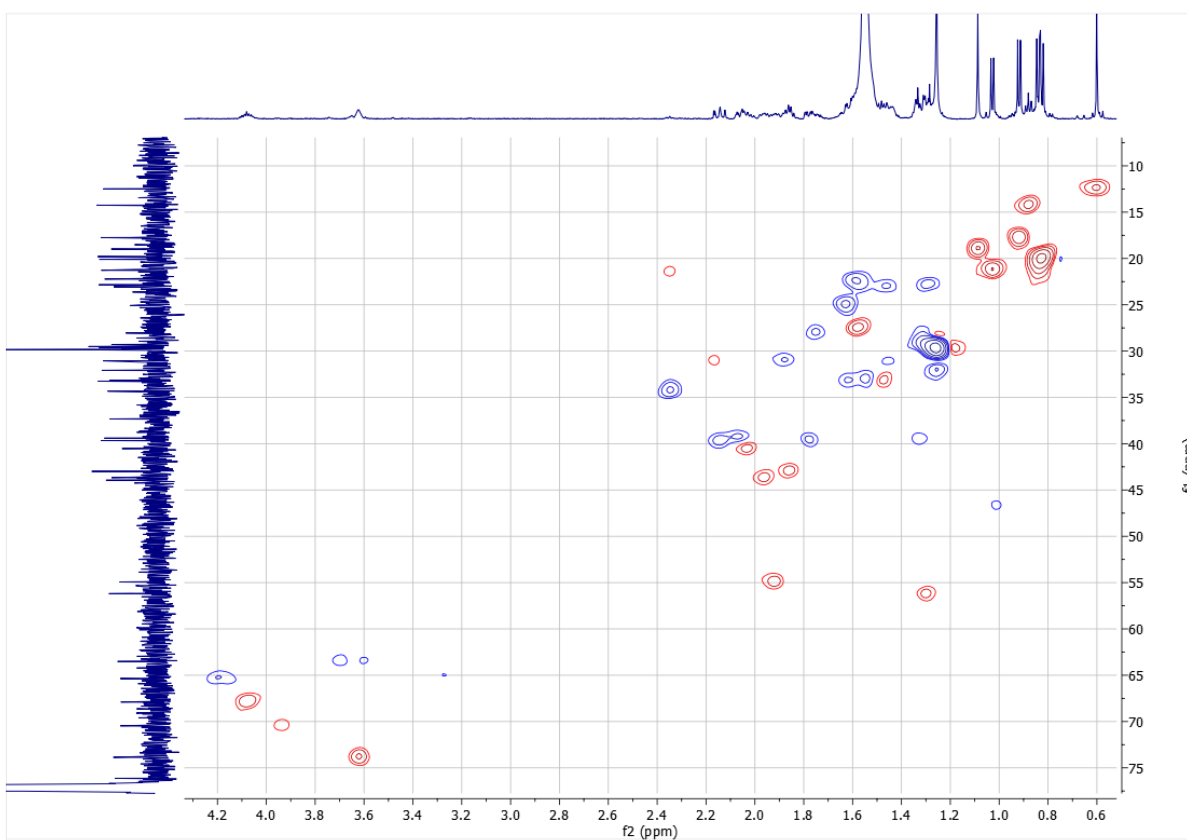

Figure 13S. The HSQC spectrum of **3** in  $\text{CDCl}_3$

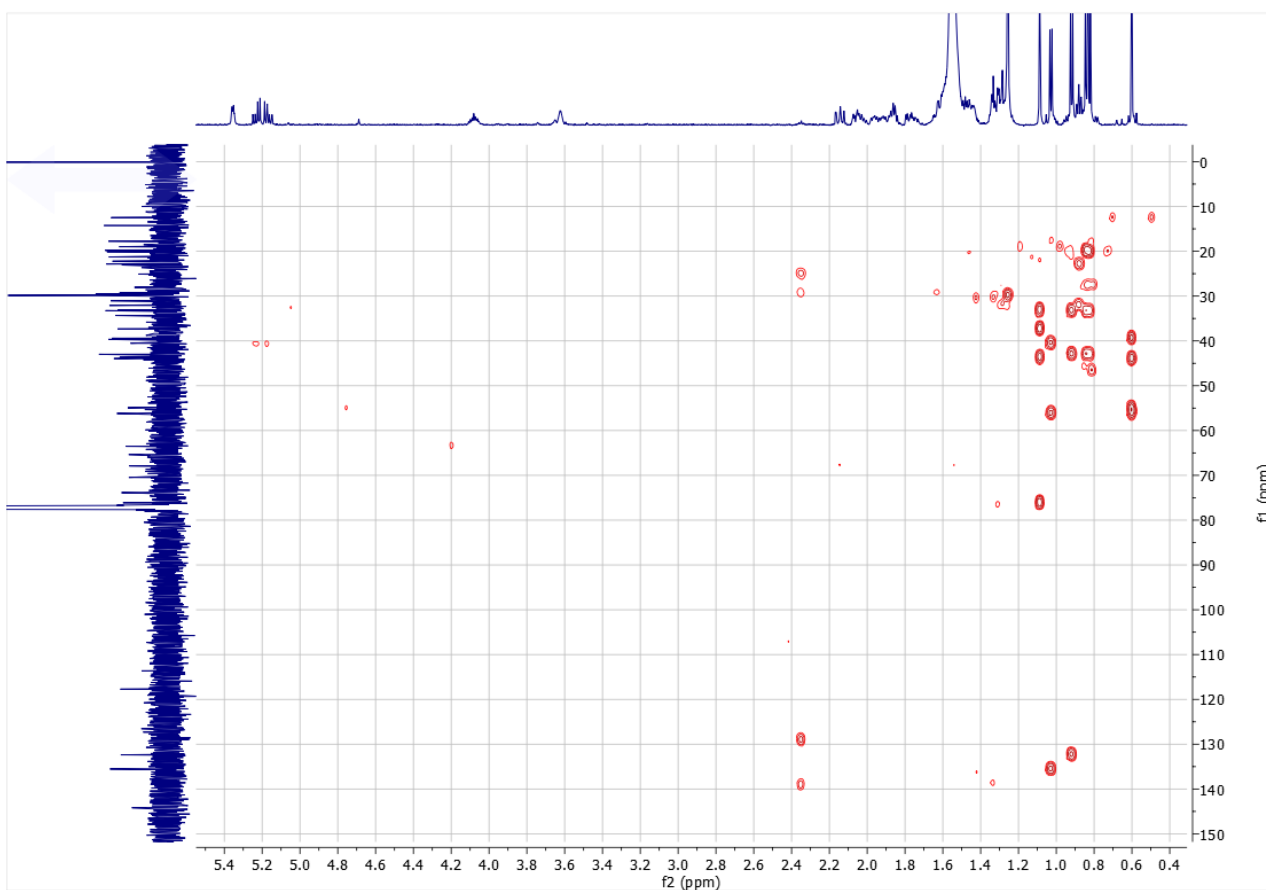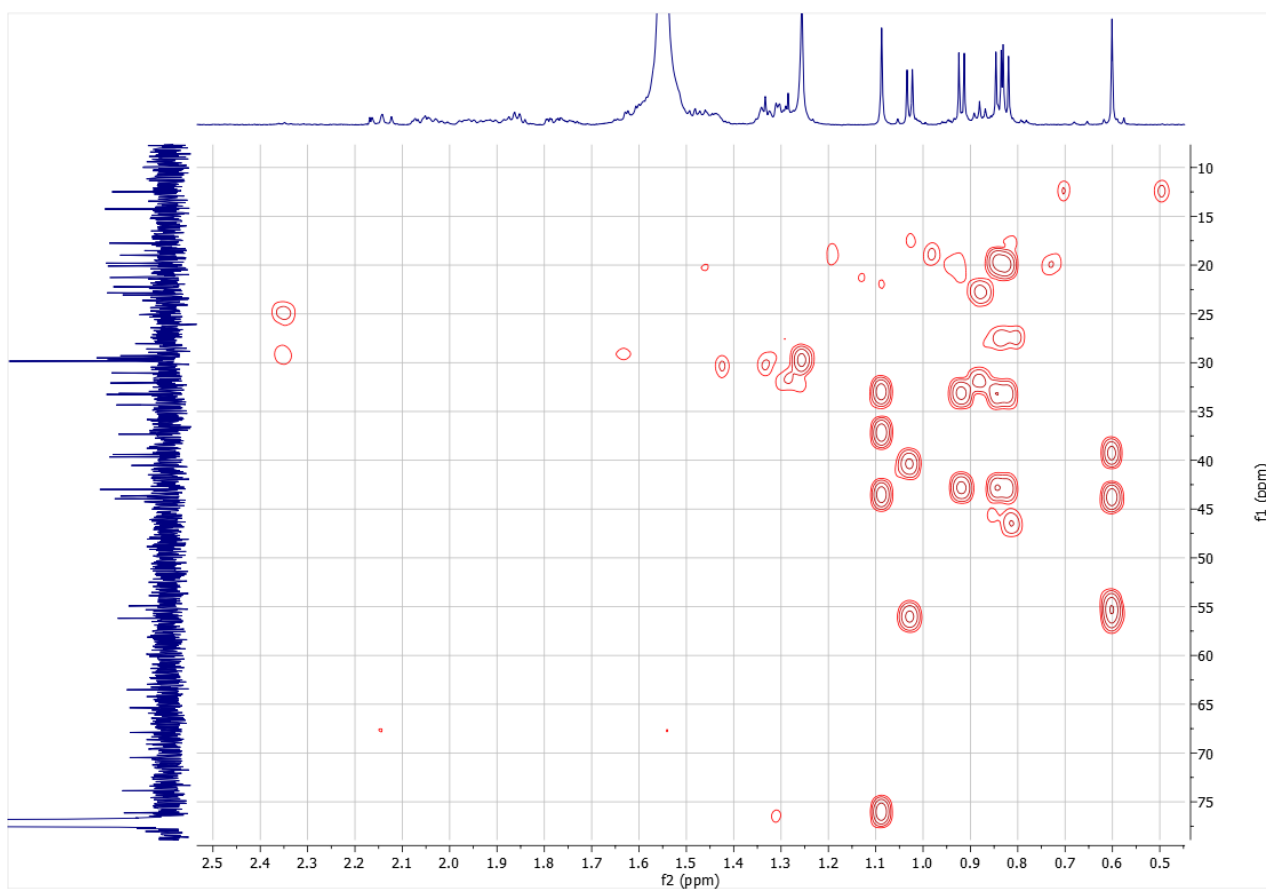

**Figure 14S.** The HMBC spectrum of **3** in  $\text{CDCl}_3$

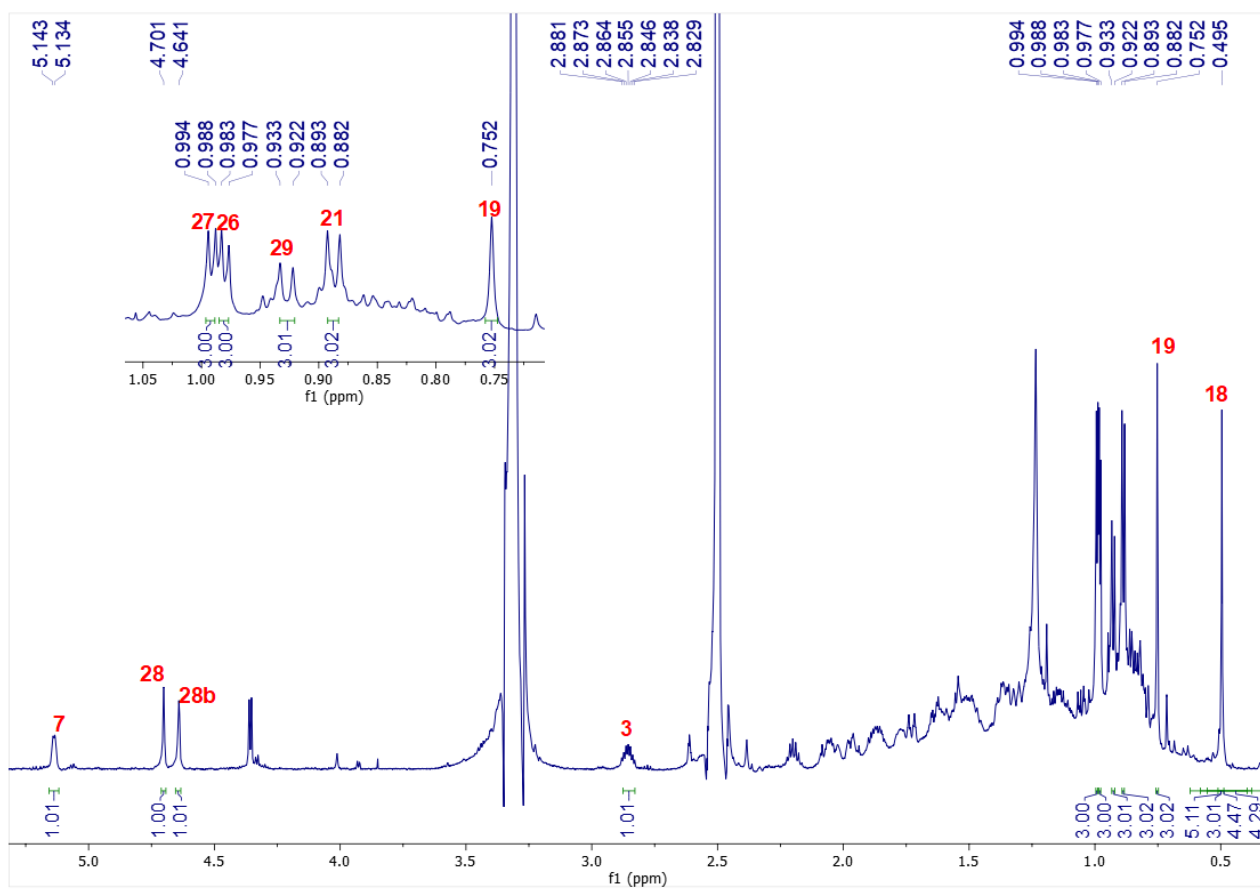

Figure 15S. The  $^1\text{H}$  NMR spectrum of **4** in  $\text{CDCl}_3$

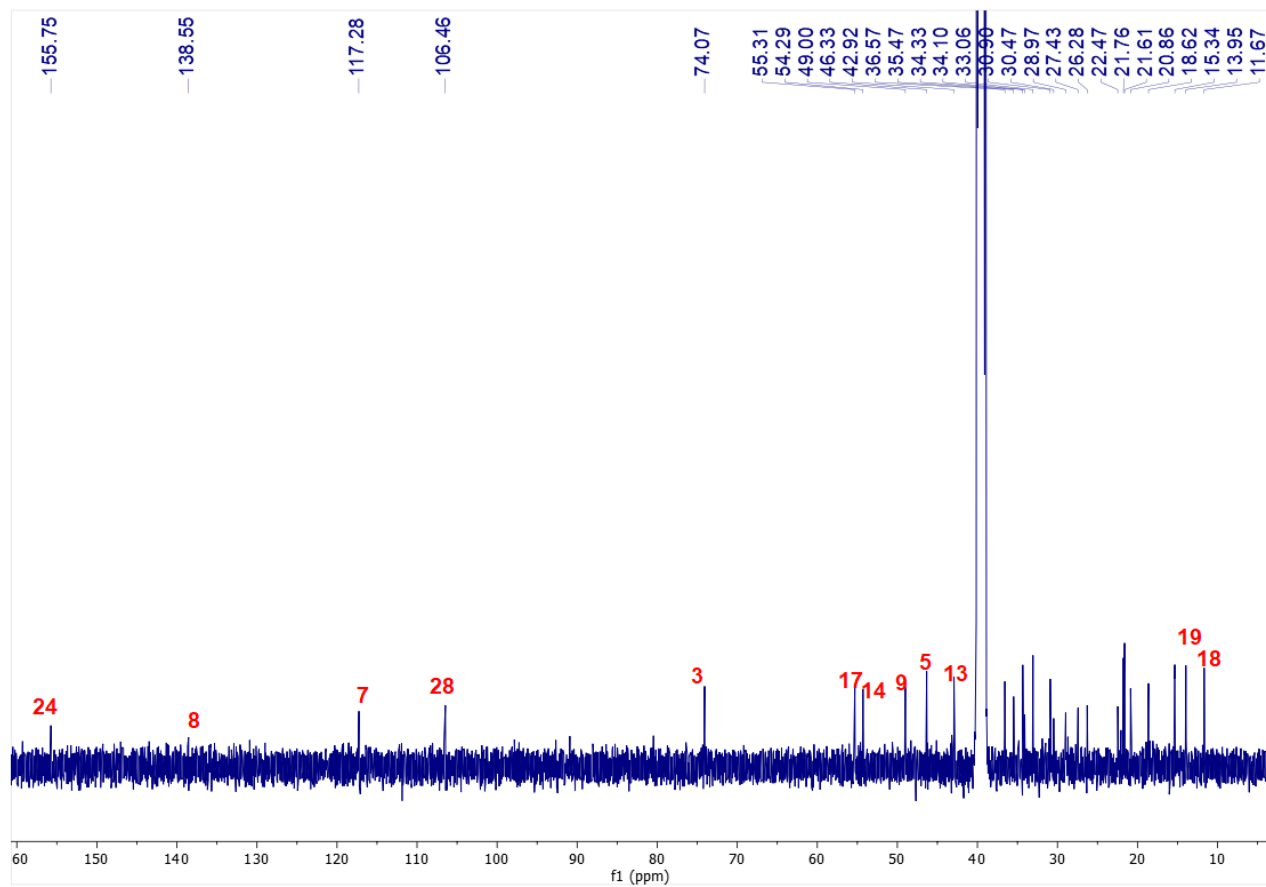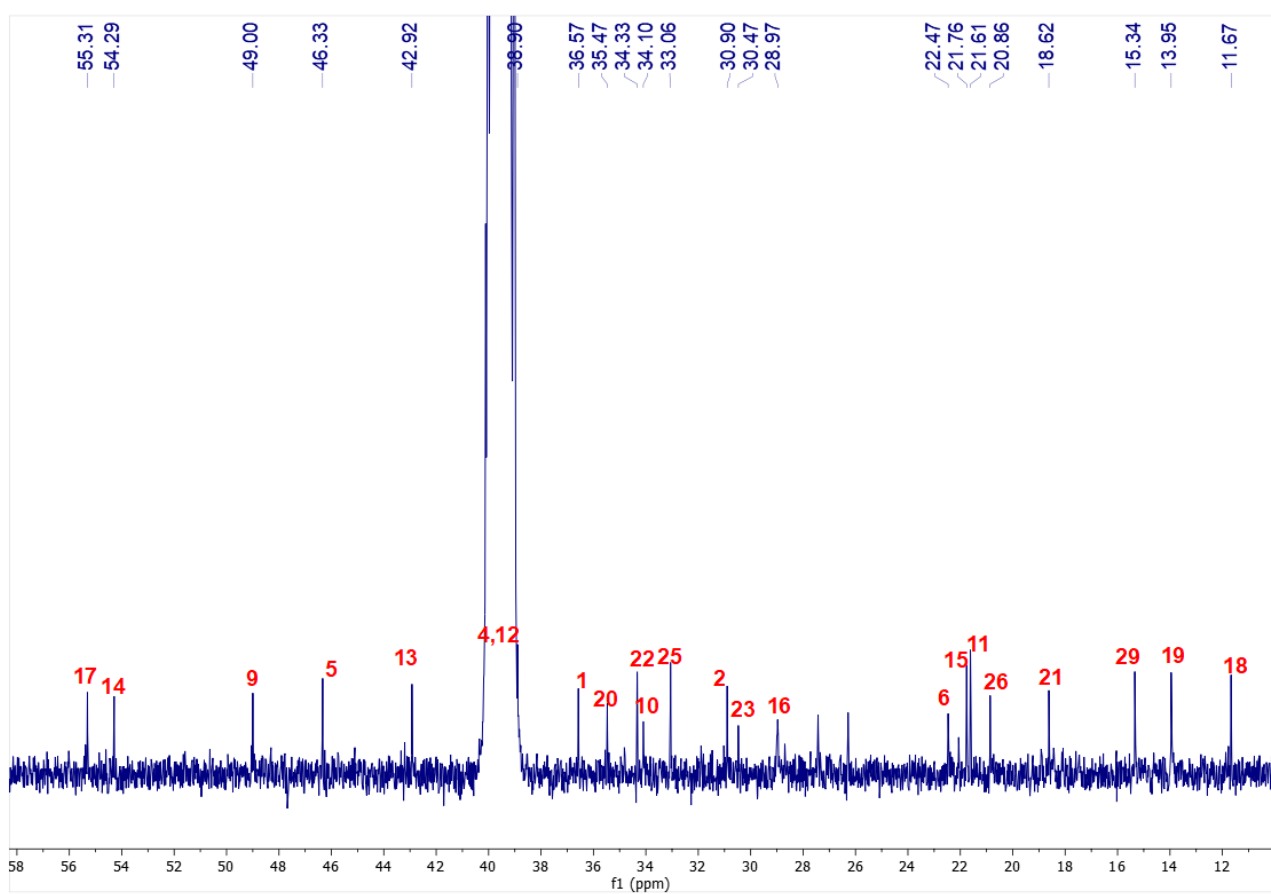

Figure 16S. The  $^{13}\text{C}$  NMR spectrum of 4 in  $\text{CDCl}_3$

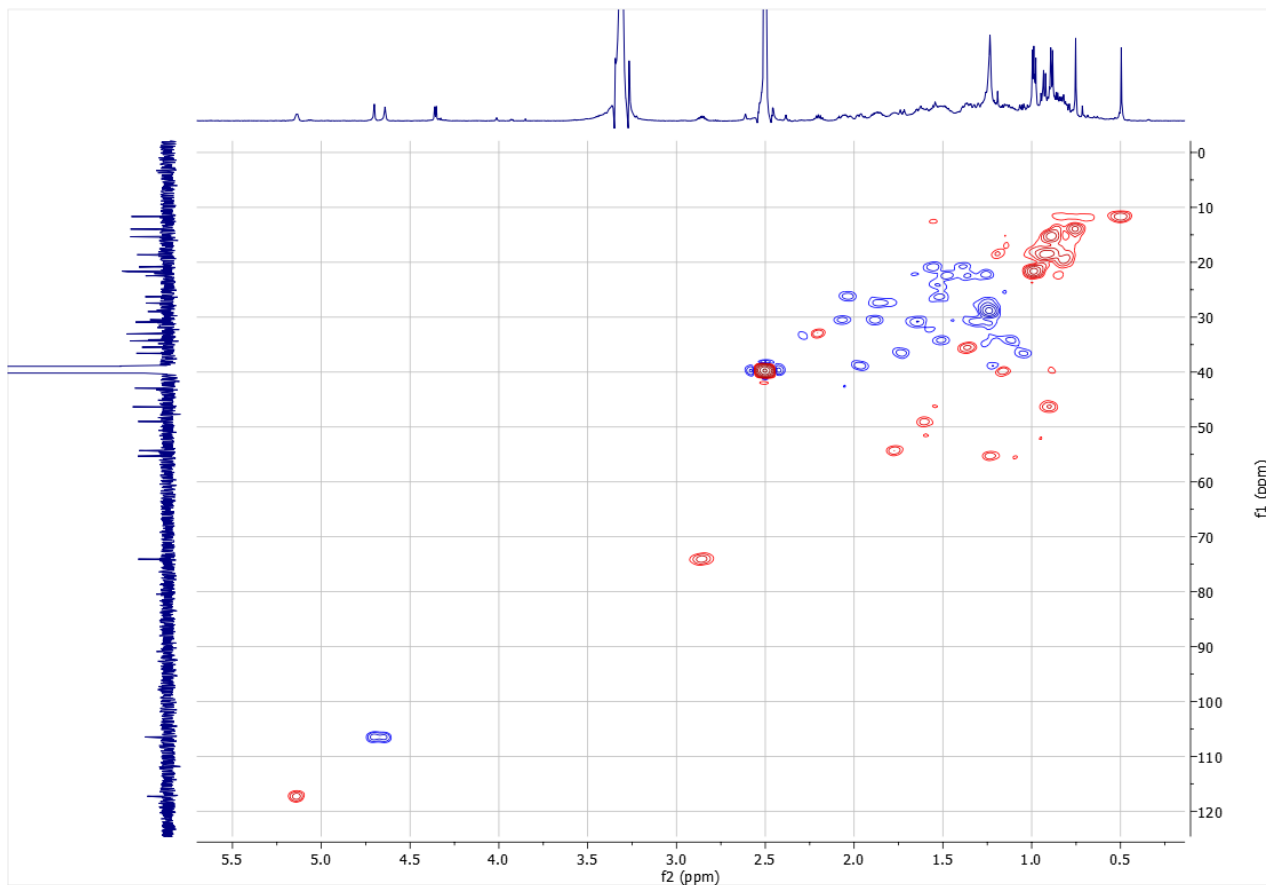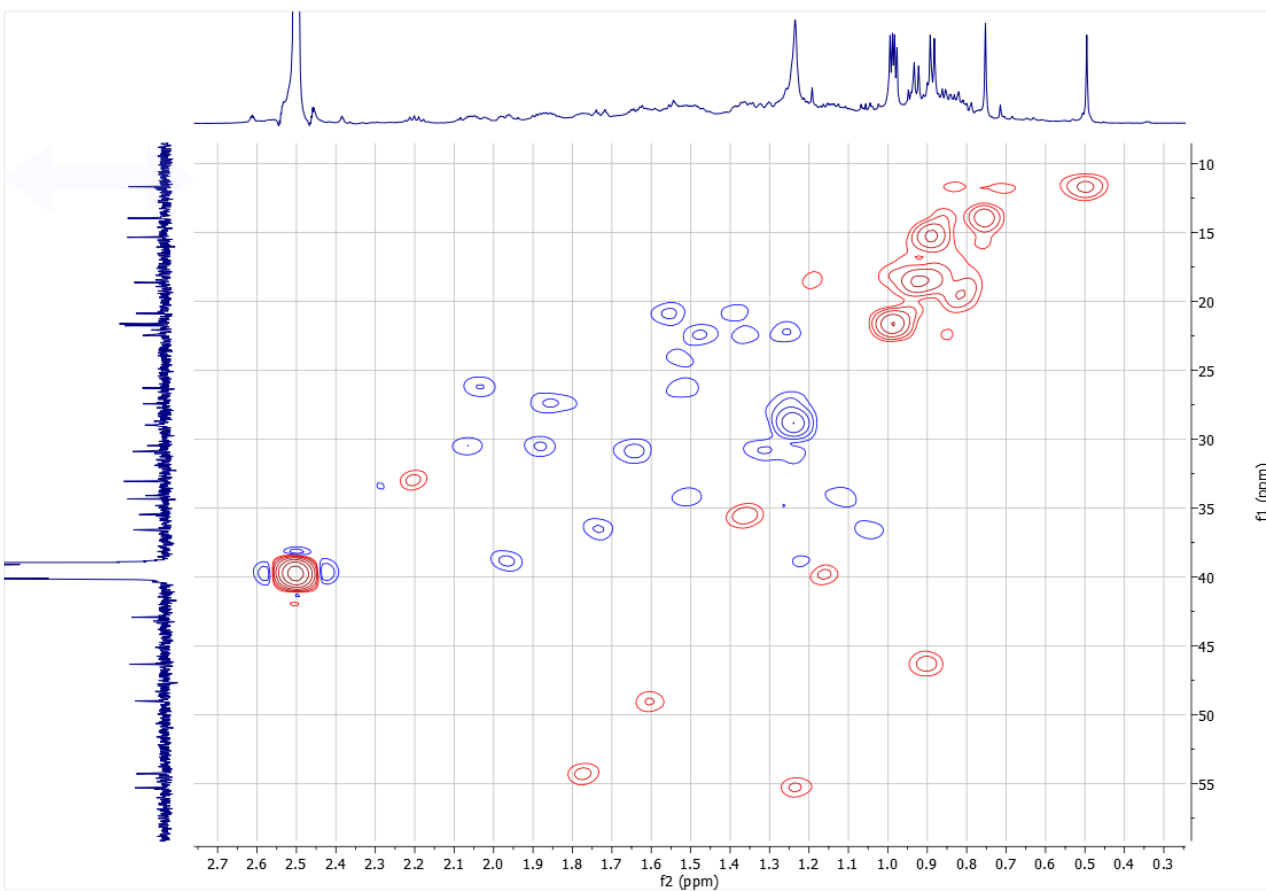

Figure 17S. The HSQC spectrum of 4 in  $\text{CDCl}_3$



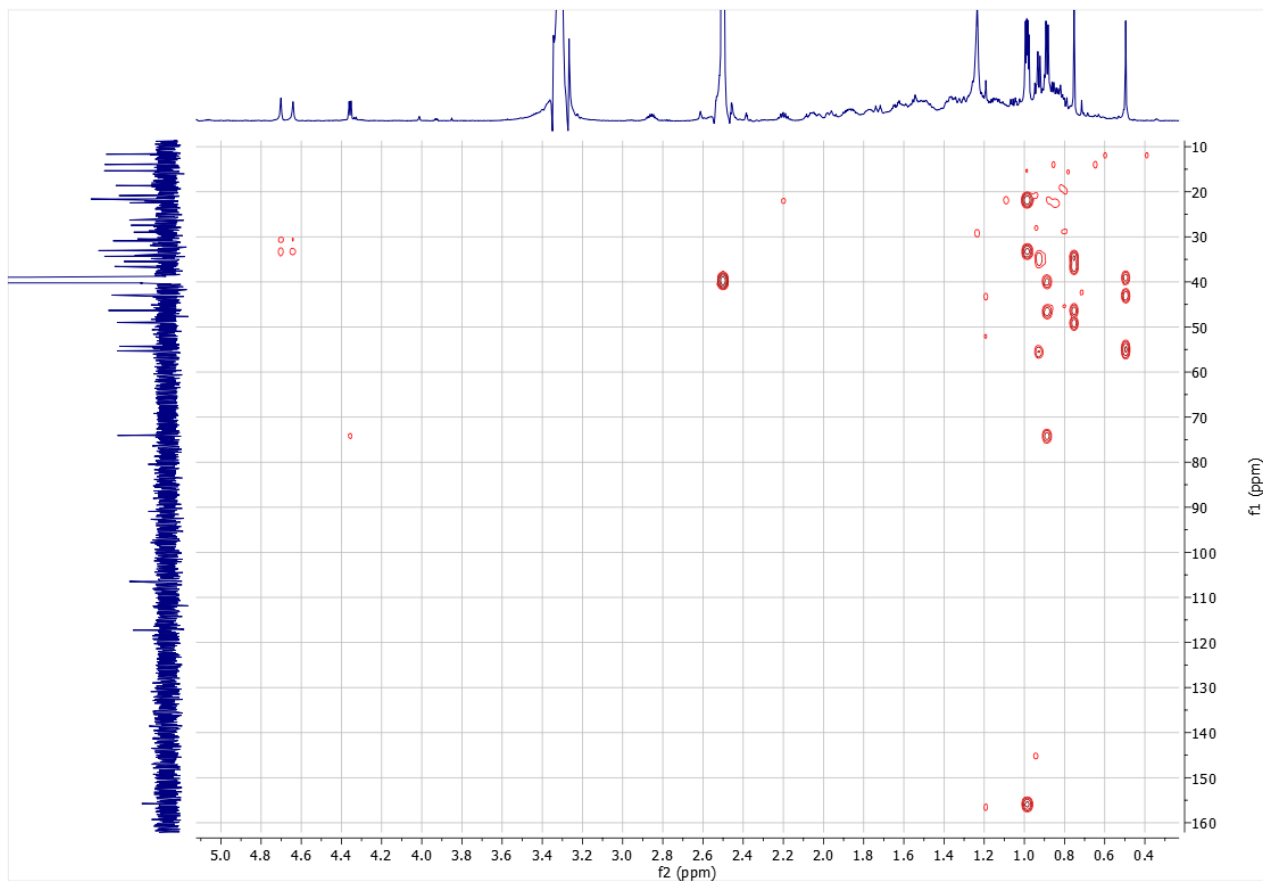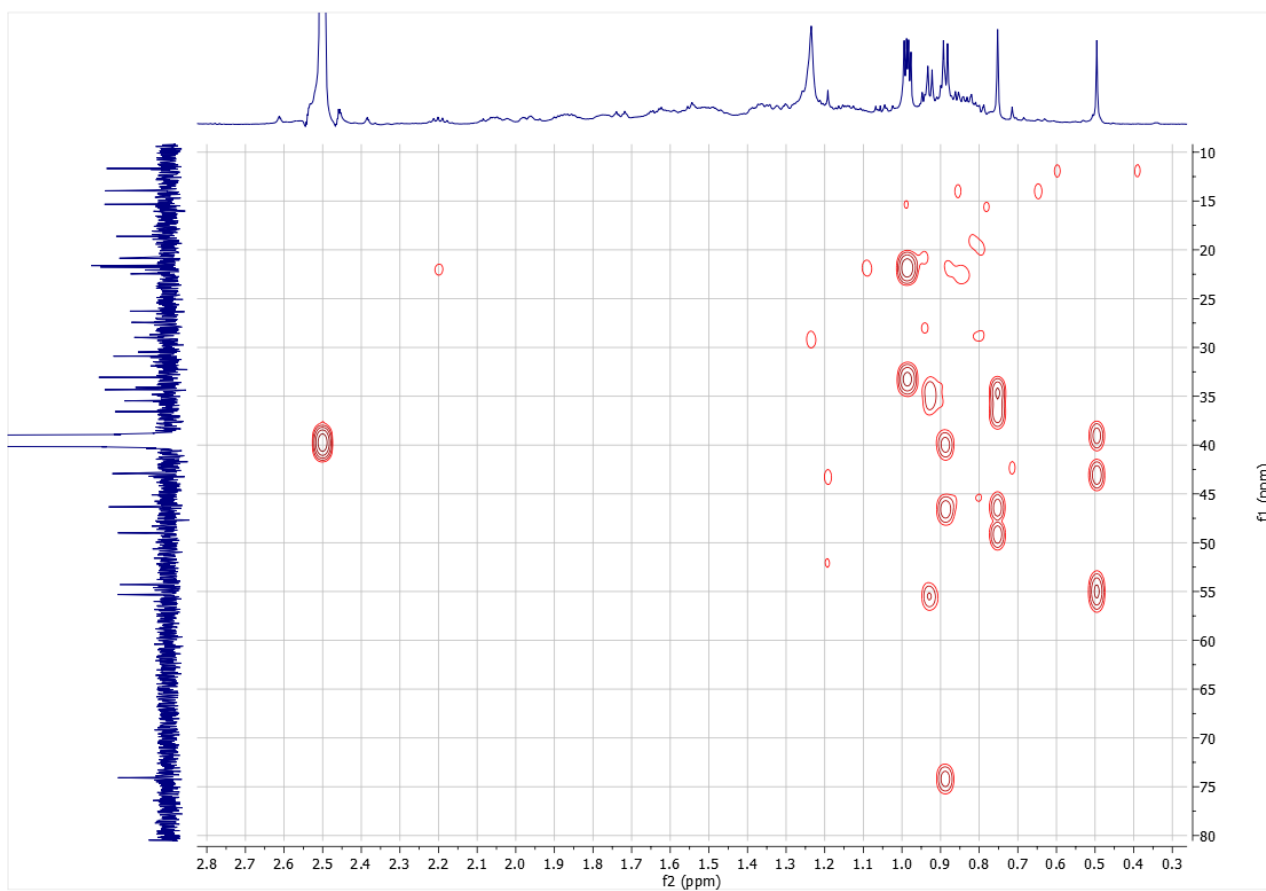

**Figure 18S.** The HMBC spectrum of **4** in  $\text{CDCl}_3$

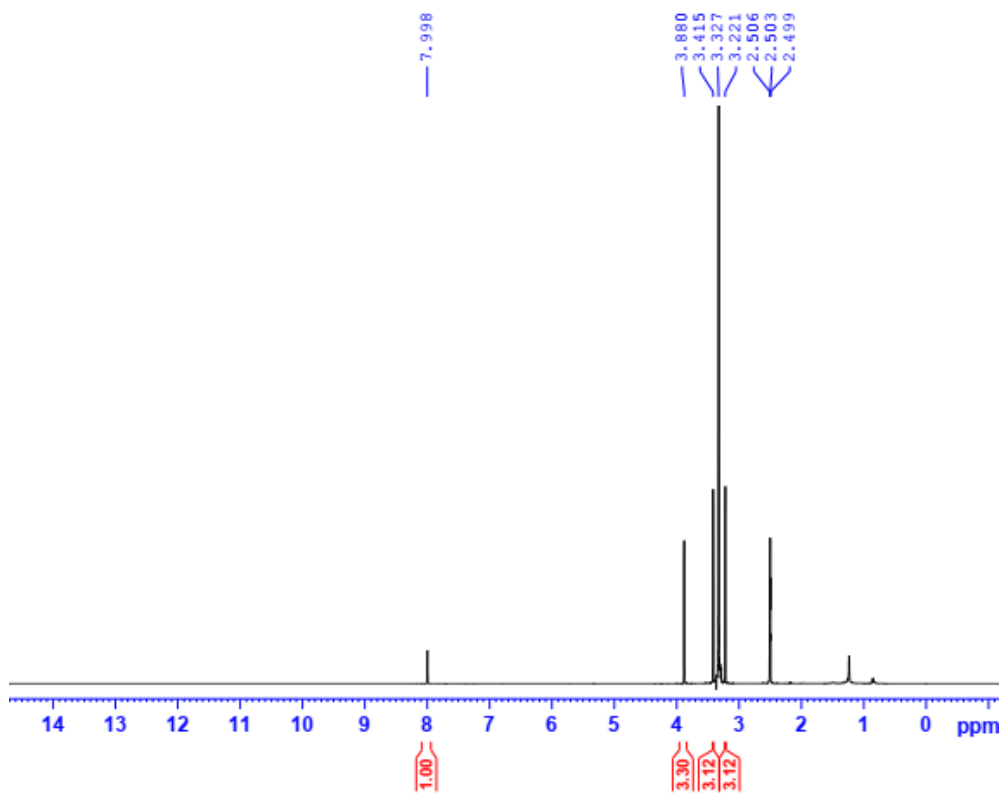

**Figure 19S.** The  $^1\text{H}$  NMR spectrum of **5** in  $\text{DMSO-}d_6$

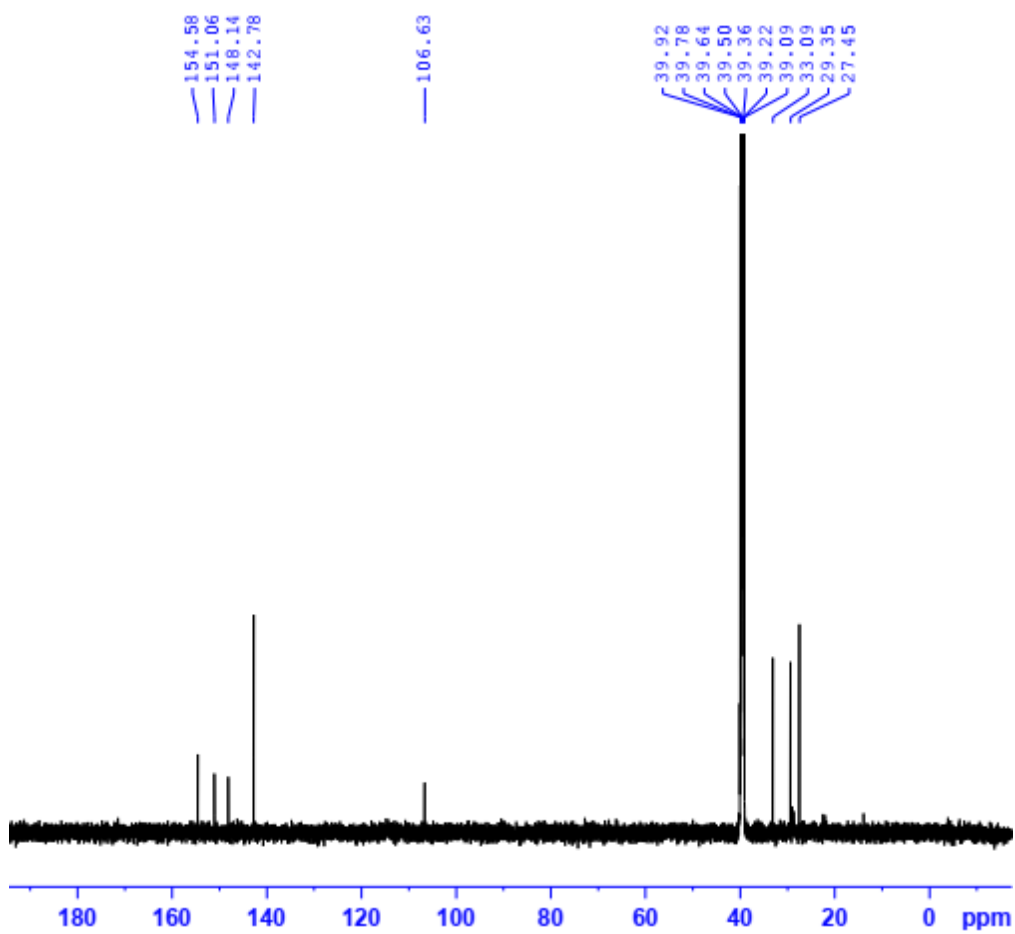

**Figure 20S.** The  $^{13}\text{C}$  NMR spectrum of **5** in  $\text{DMSO-}d_6$

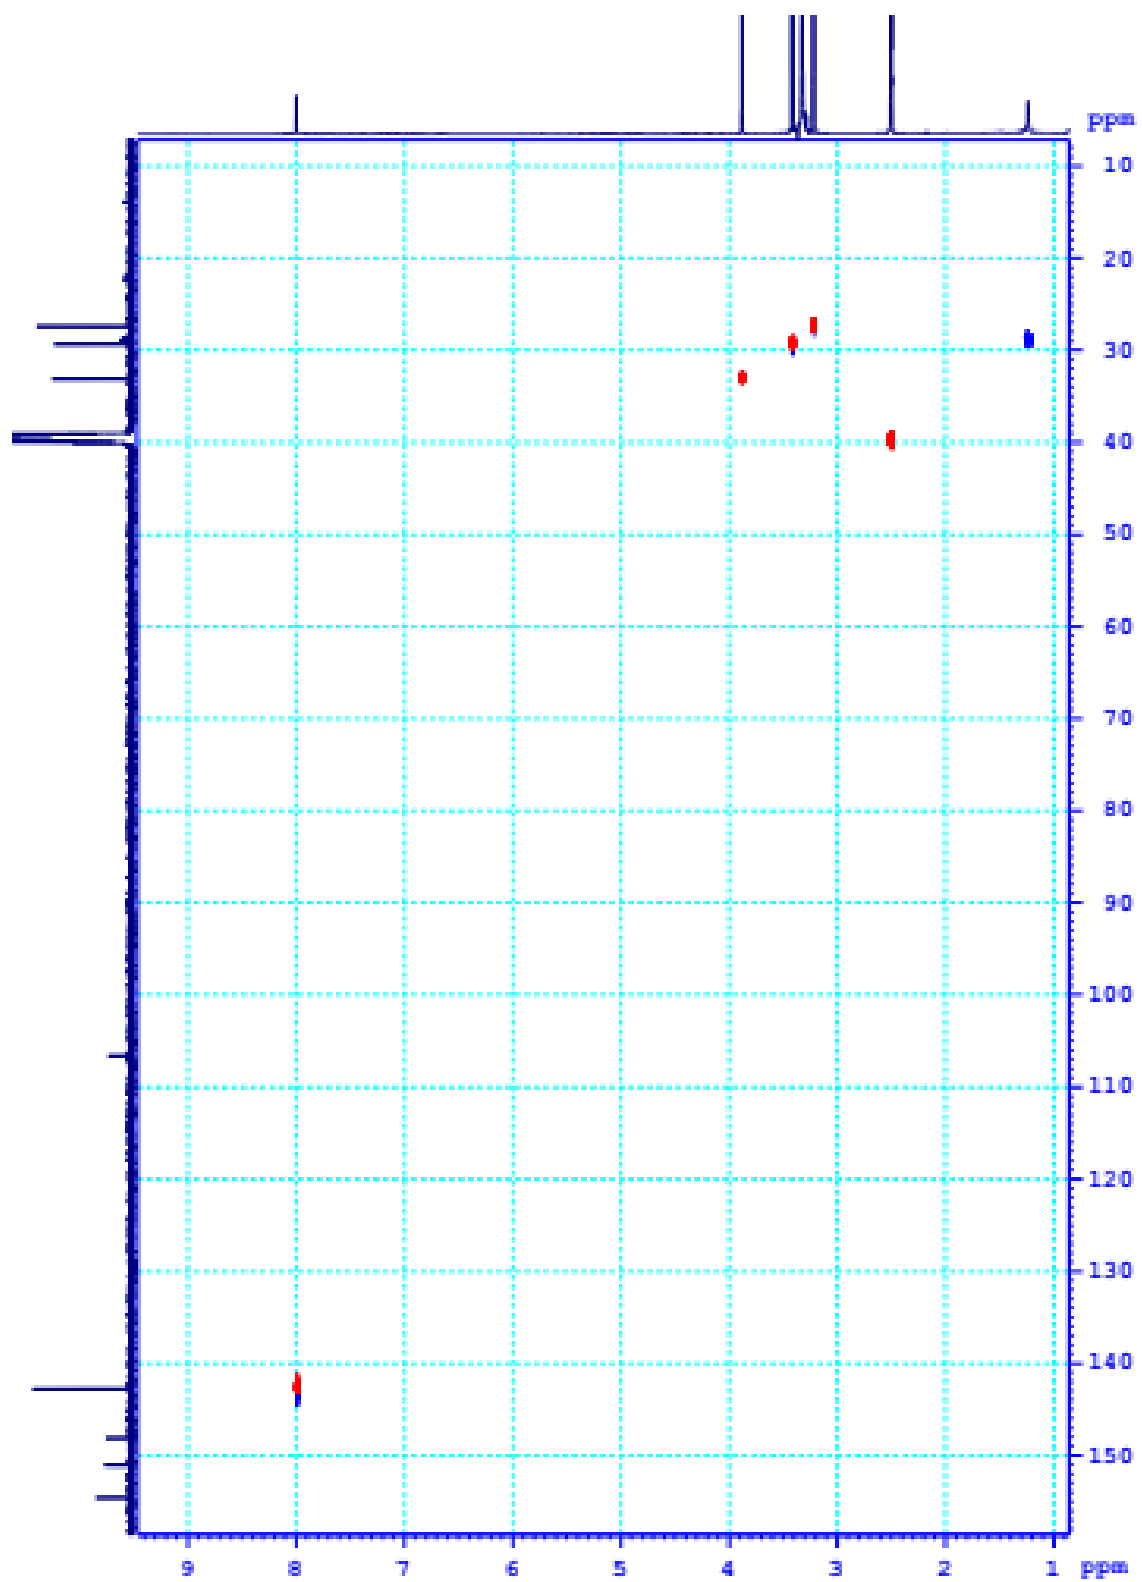

**Figure 21S.** The HSQC spectrum of **5** in  $\text{DMSO-}d_6$

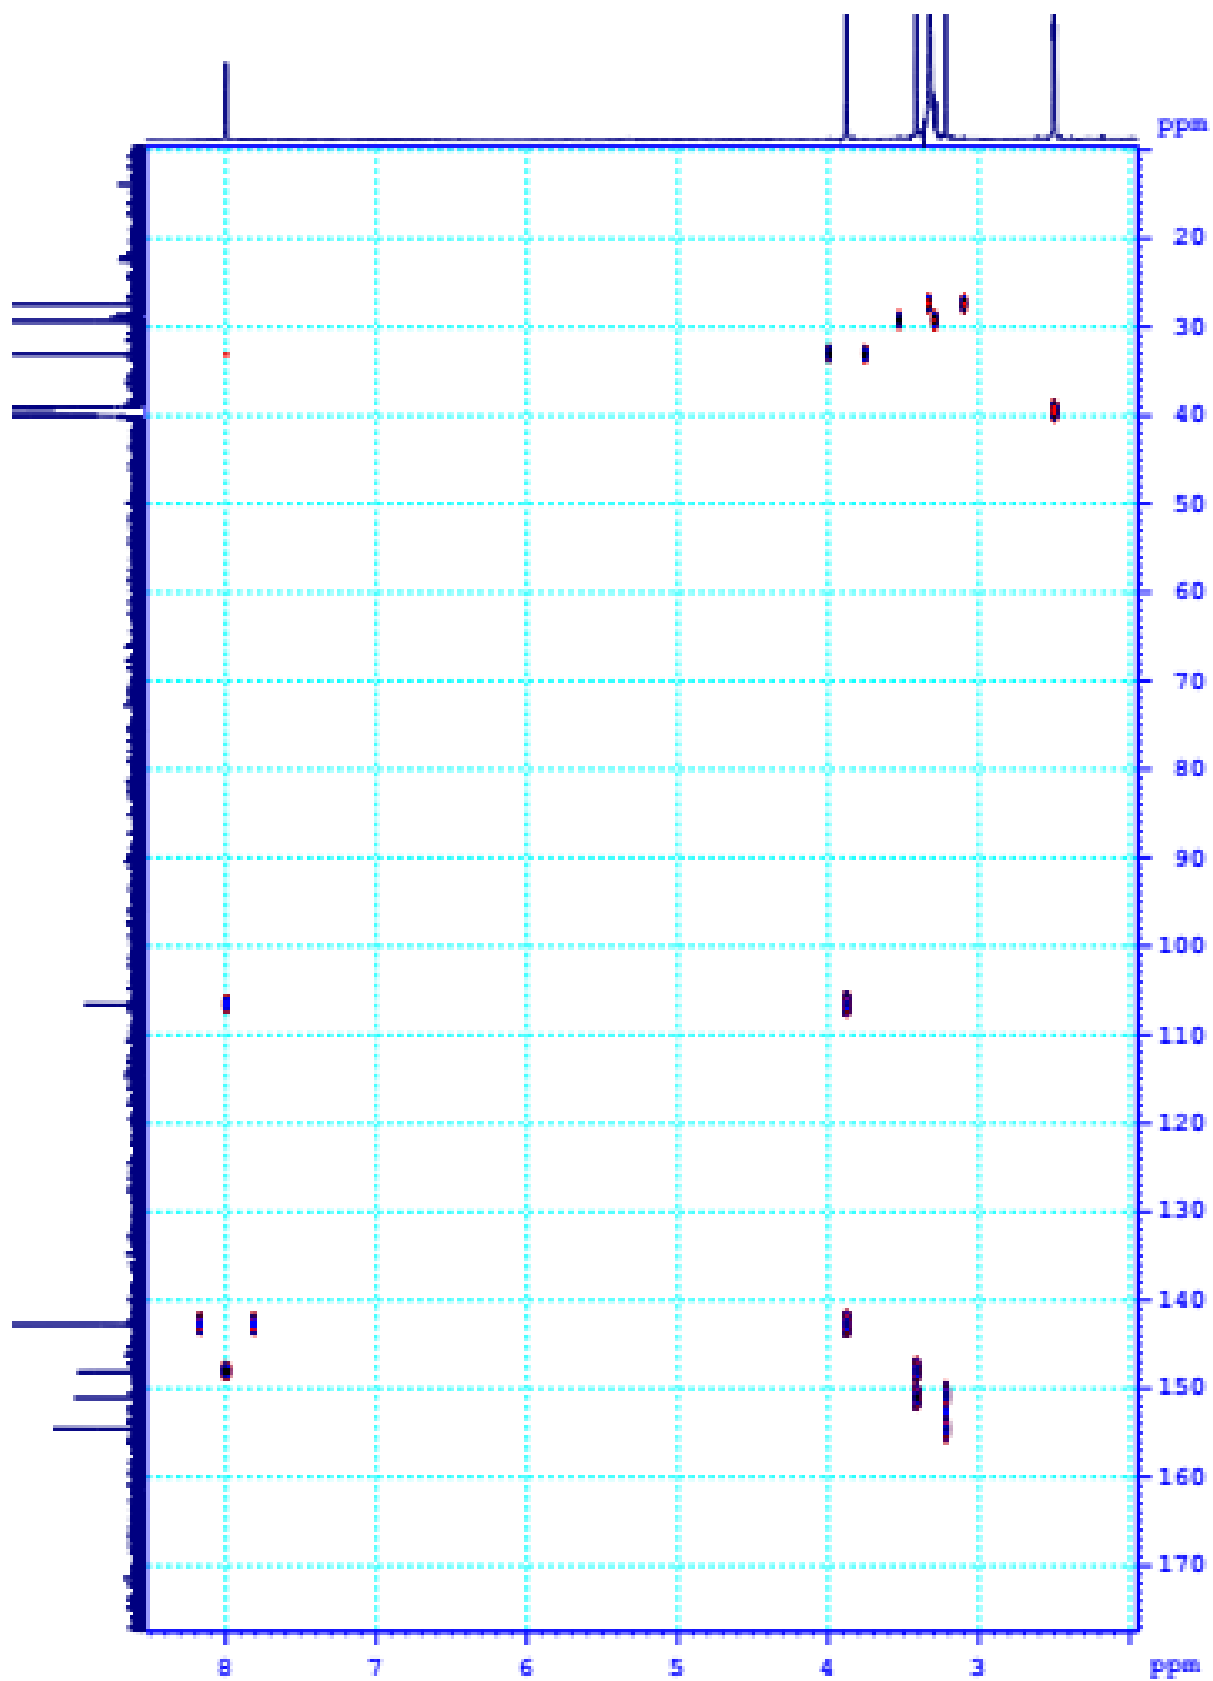

Figure 22S. The HMBC spectrum of **5** in DMSO-*d*<sub>6</sub>

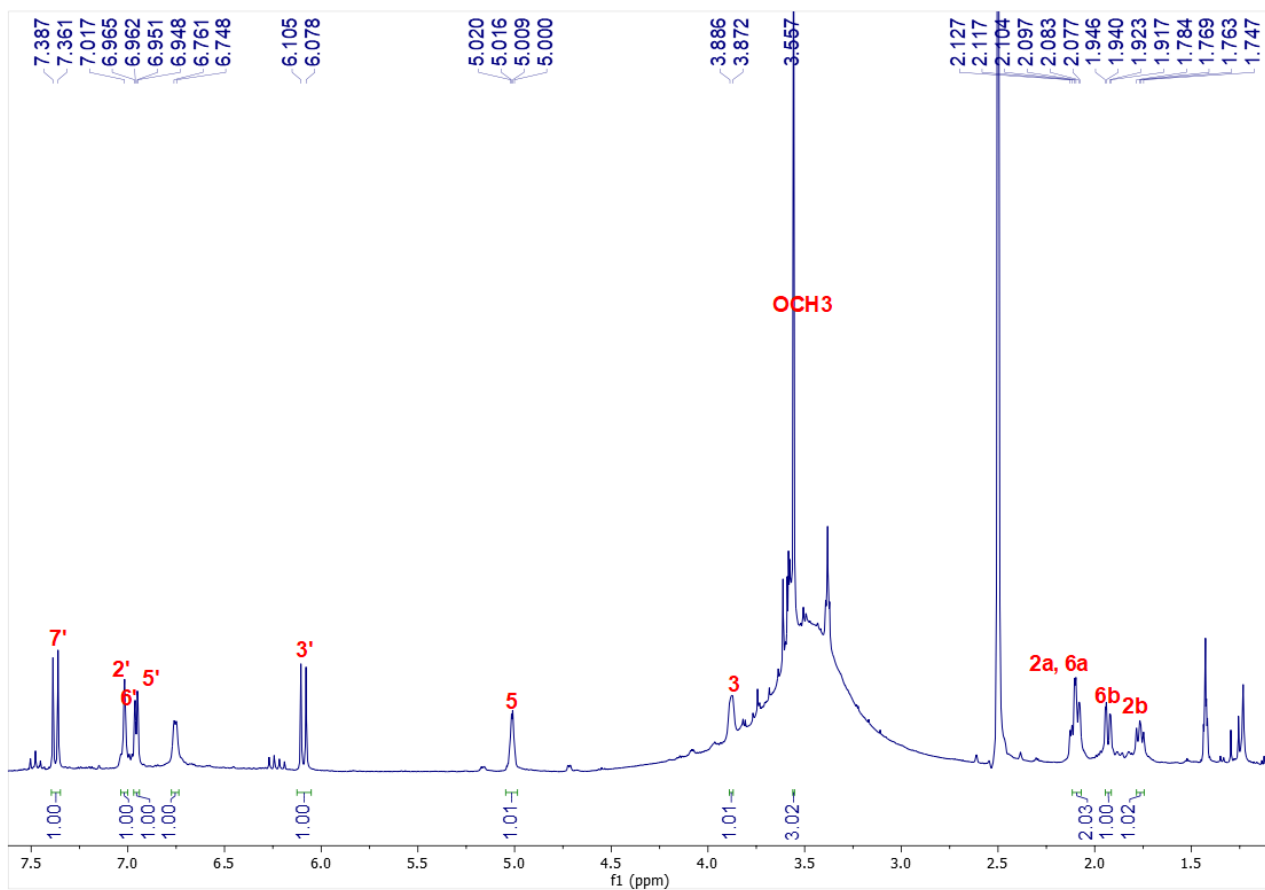

Figure 23S. The  $^1\text{H}$  NMR spectrum of **6** in  $\text{DMSO-}d_6$

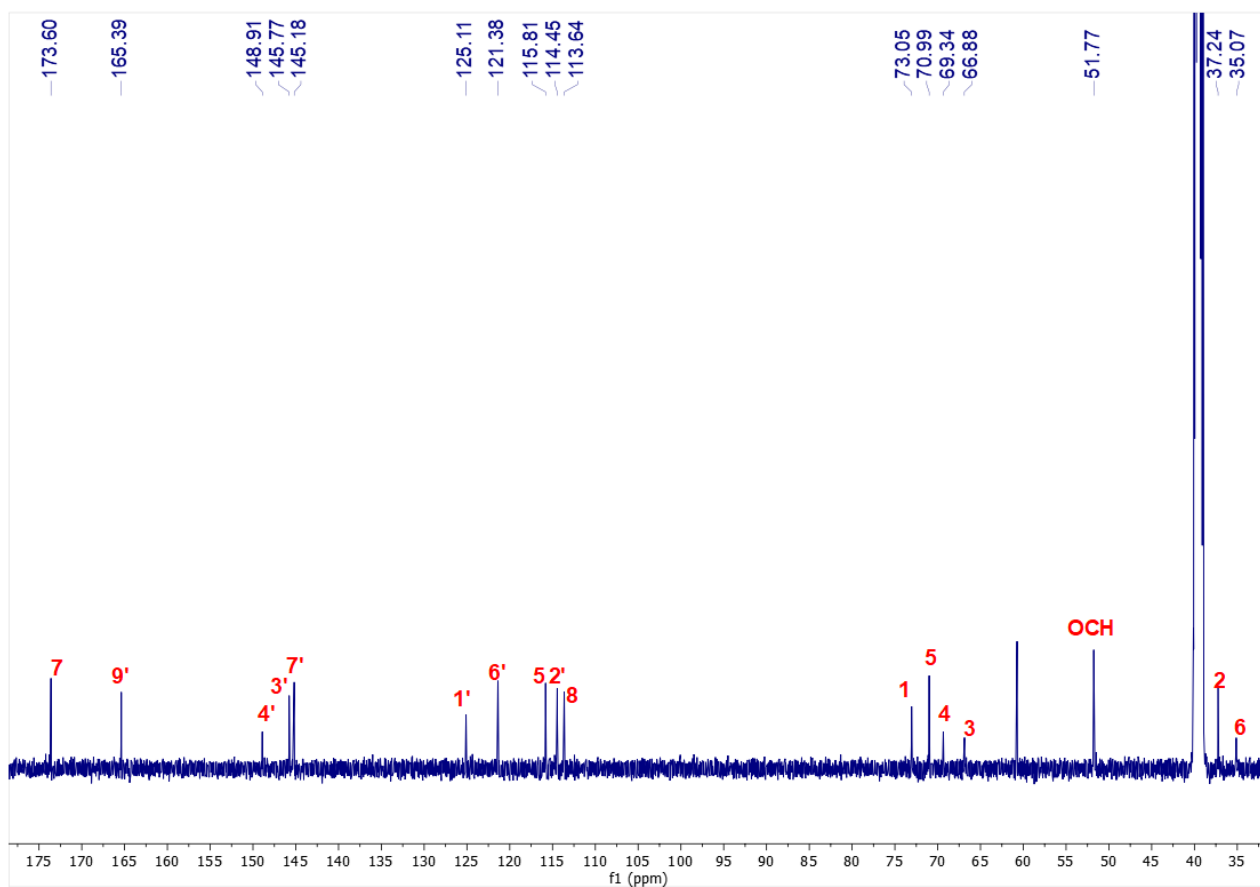

Figure 24S. The  $^{13}\text{C}$  NMR spectrum of **6** in  $\text{DMSO-}d_6$

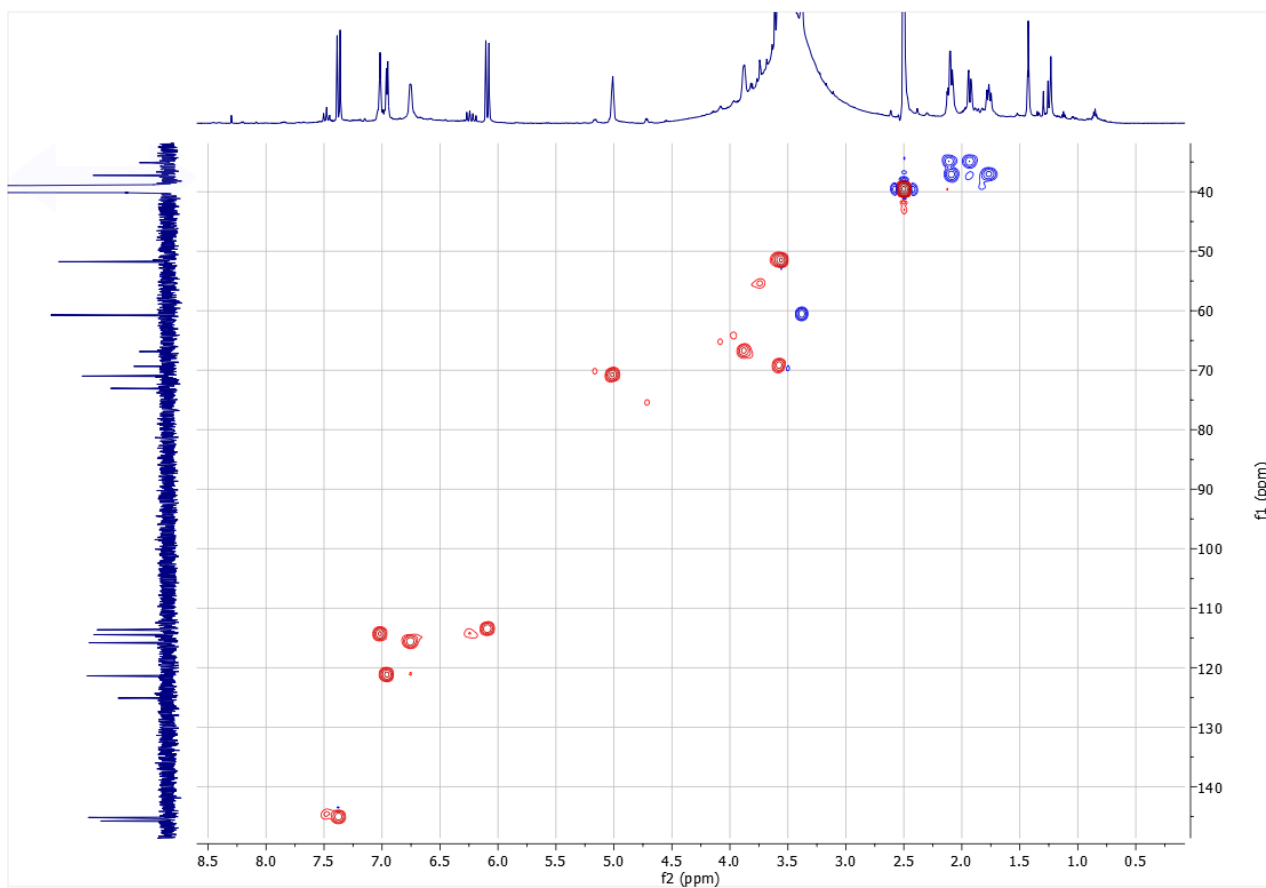

**Figure 25S.** The HSQC spectrum of of **6** in DMSO- $d_6$

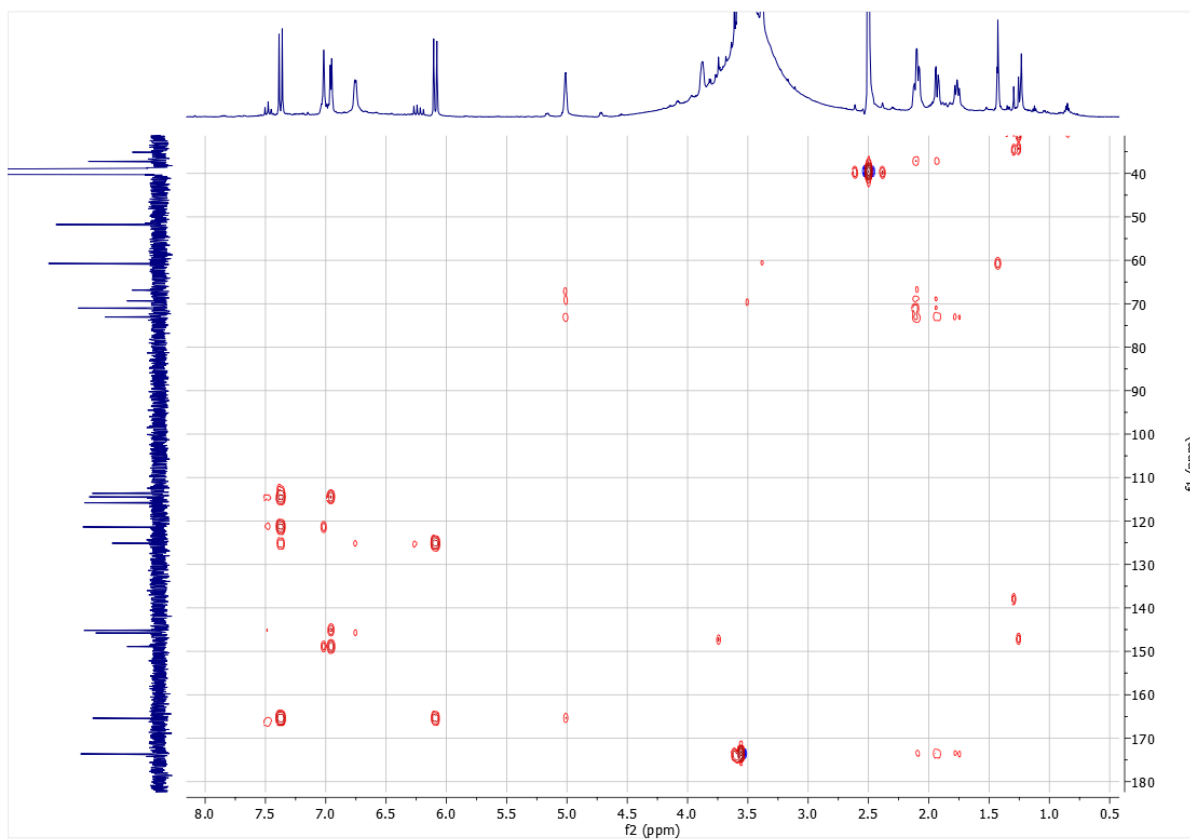

**Figure 26S.** The HMBC spectrum of **6** in DMSO- $d_6$

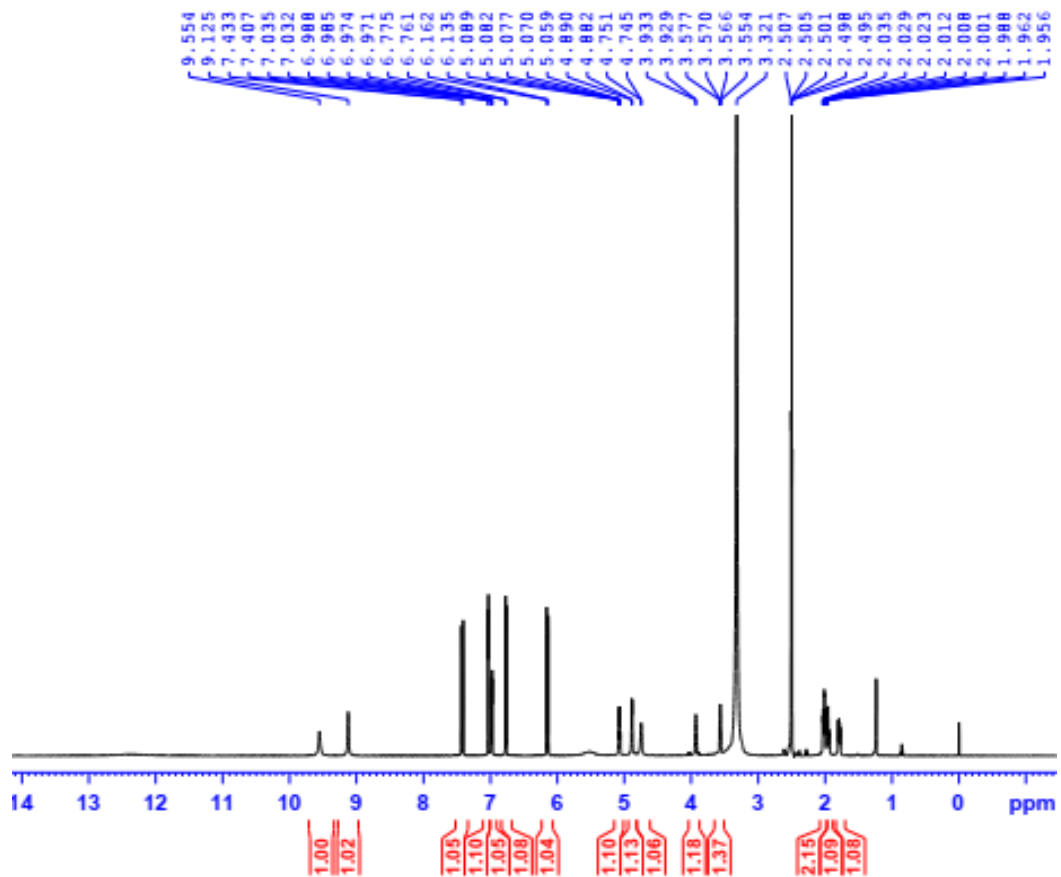

Figure 27S. The  $^1\text{H}$  NMR spectrum of 7 in  $\text{DMSO-}d_6$

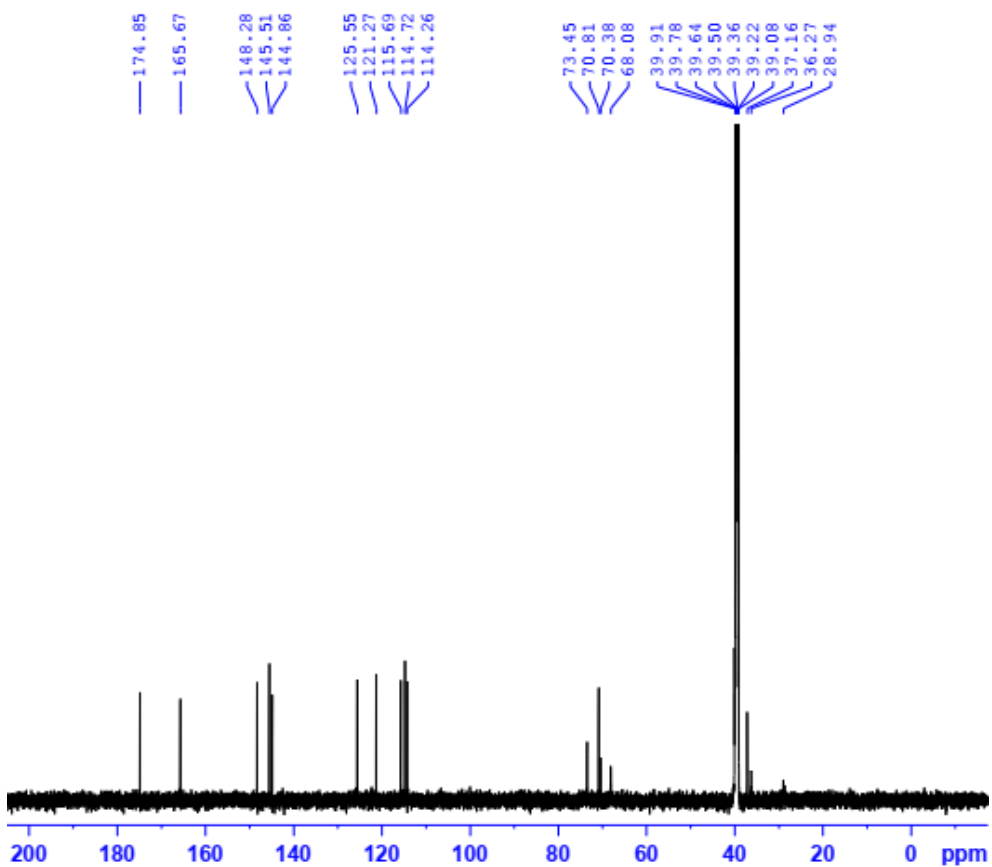

Figure 28S. The  $^{13}\text{C}$  NMR spectrum of 7 in  $\text{DMSO-}d_6$

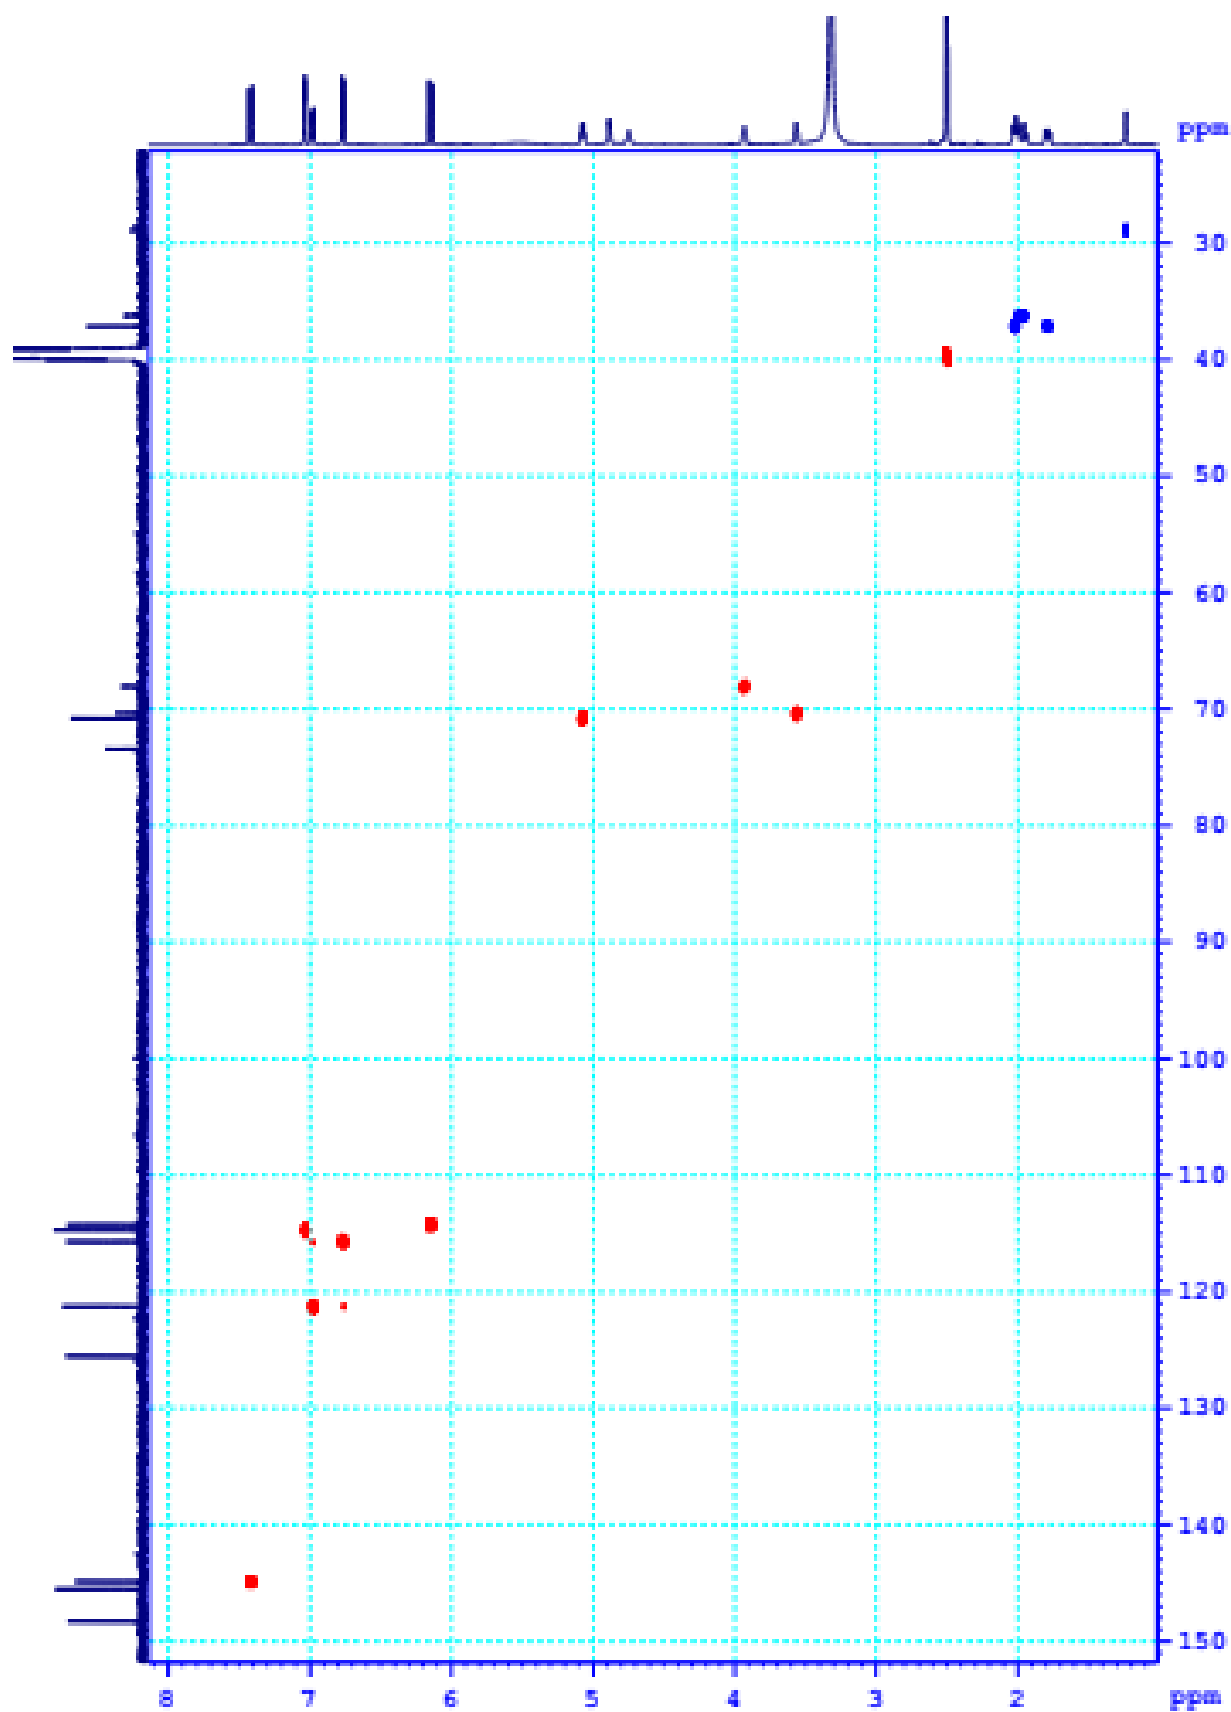

Figure 29S. The HSQC spectrum of 7 in DMSO- $d_6$



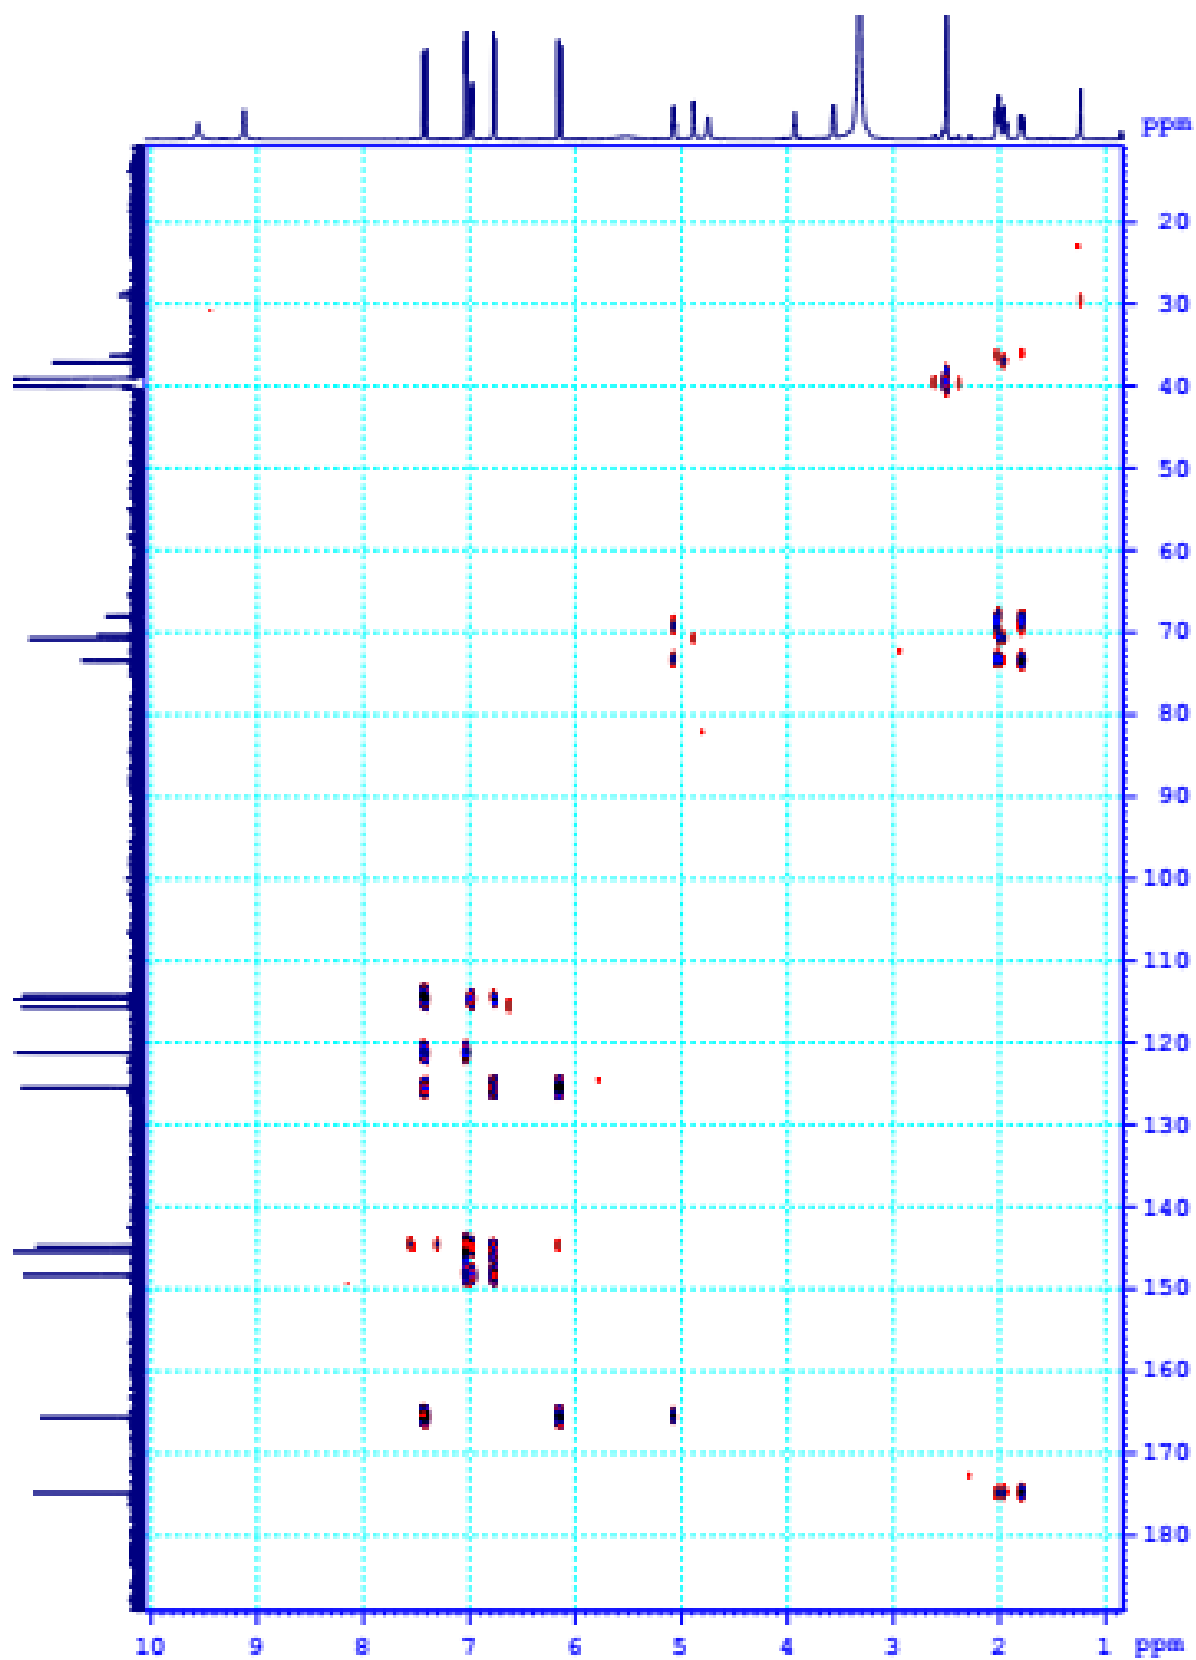

Figure 30S. The HMBC spectrum of 7 in DMSO- $d_6$

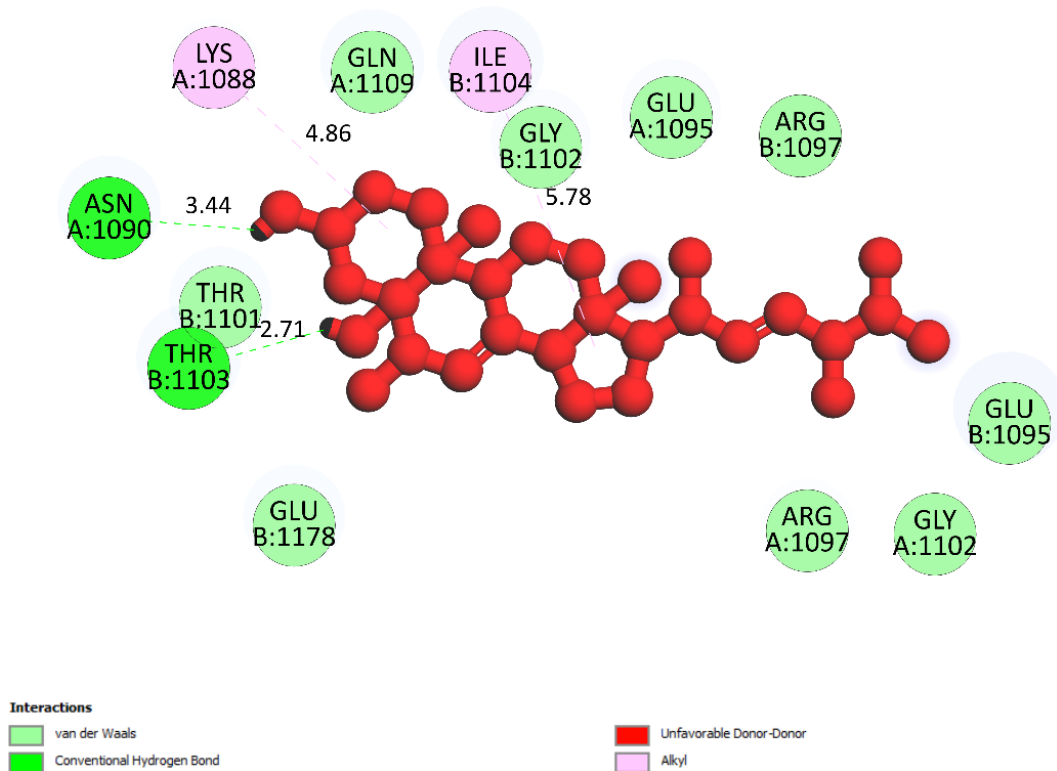

**Figure 31S.** The important ligand interactions between pose 119, compound 3 and 3TOP enzyme

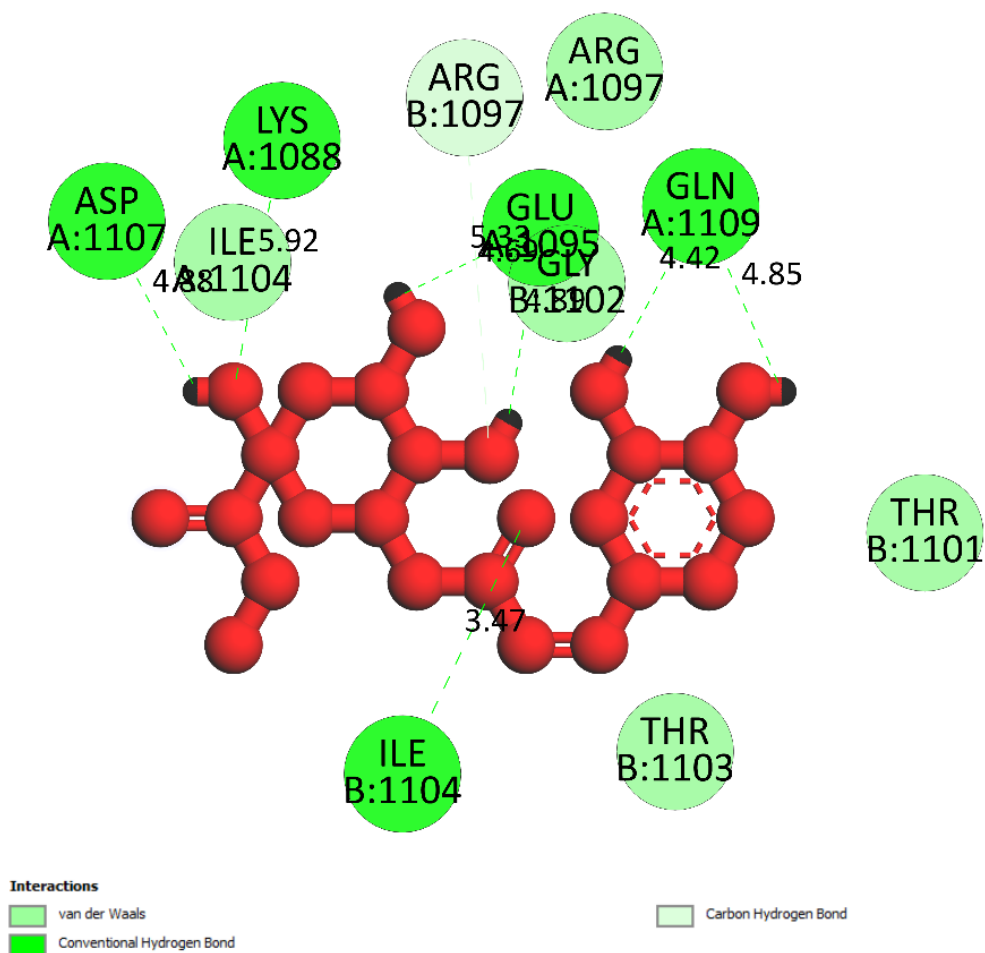

**Figure 32S.** The significant interaction between the best pose 394/ compound 6 and 3TOP on 2D diagram, not enough interactions

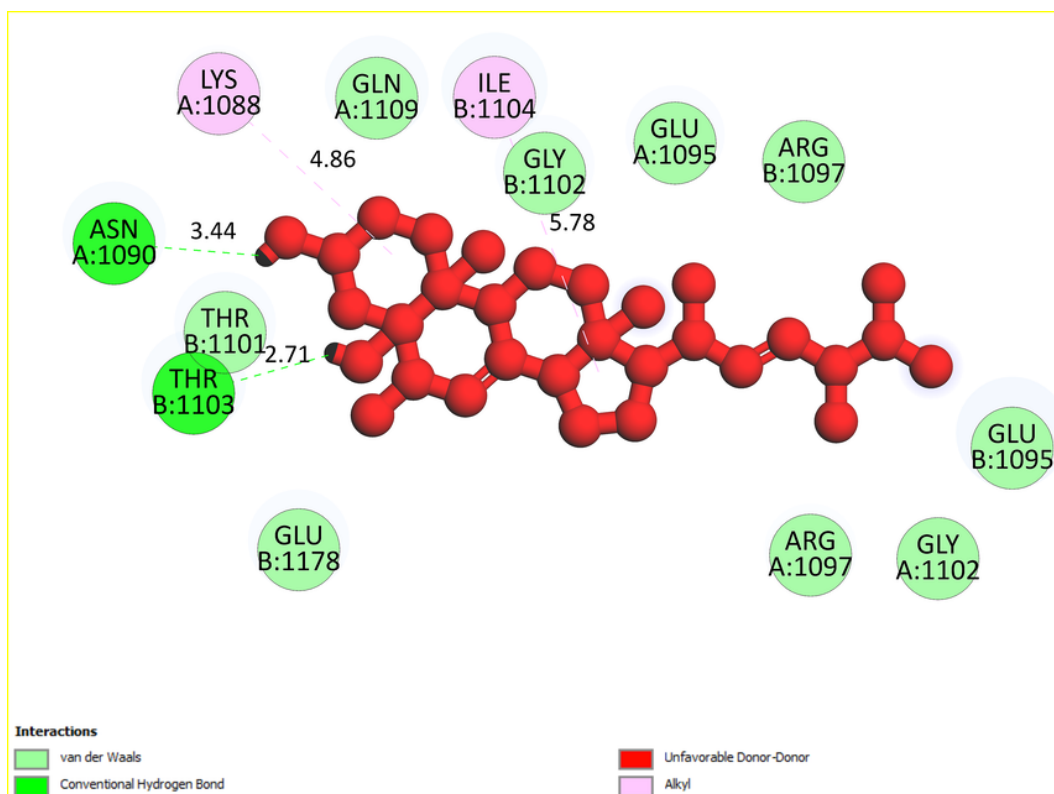

**Figure 33S.** The significant interactions between pose 491/compound **1** and 3TOP on 2D diagram, not good interactions

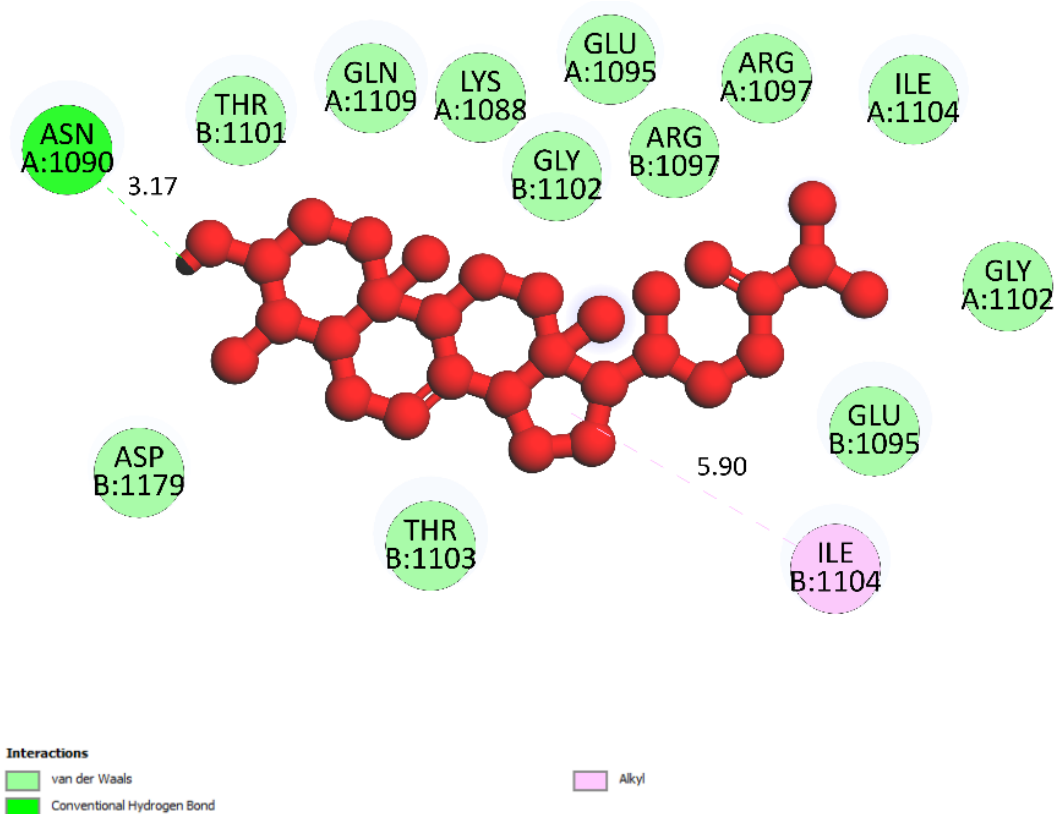

**Figure 34S.** The significant ligand interaction model between pose 237, compound **4** and 3TOP enzyme, not good interaction

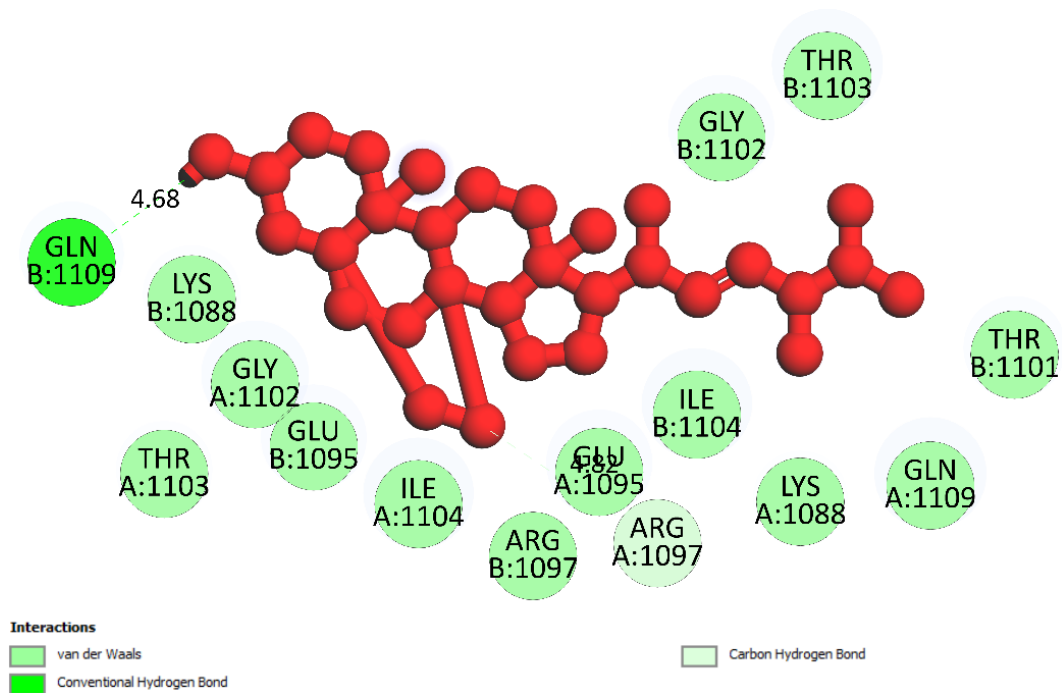

**Figure 35S.** The significant ligand interactions between **pose 155**, compound **2** and 3TOP

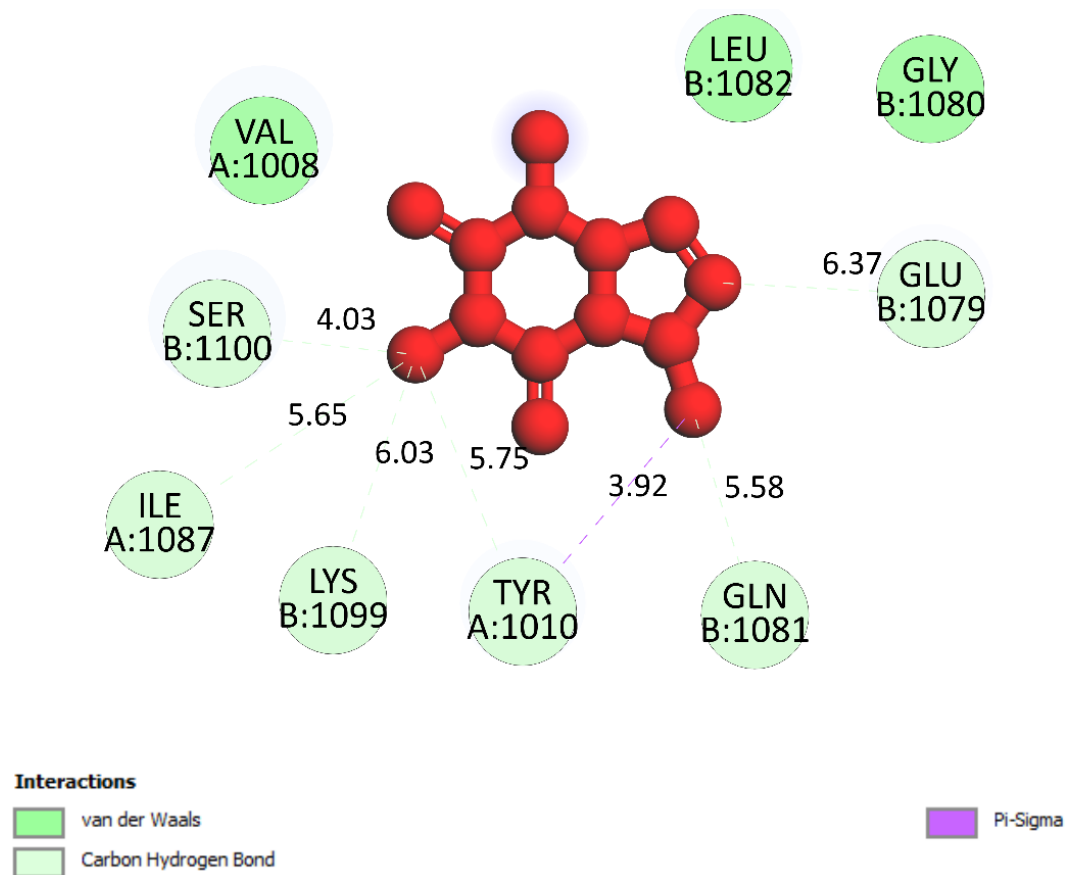

**Figure 36S.** The significant interactions between **pose 355**, compound **5** and 3TOP enzyme, not good interactions

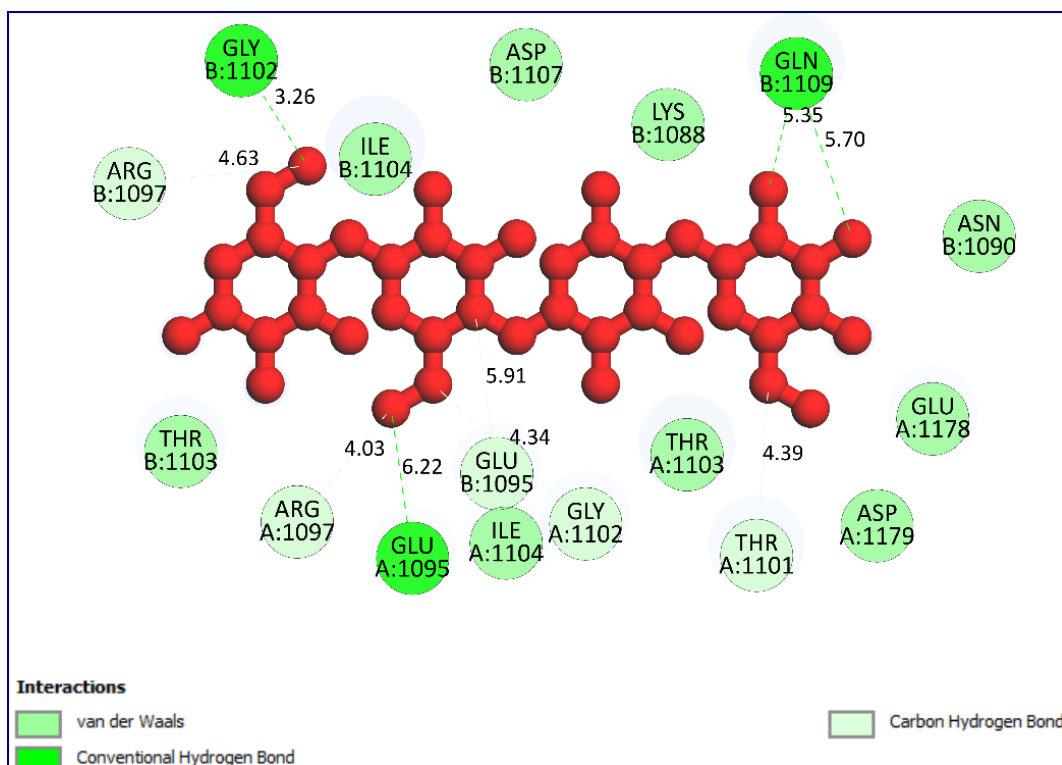

**Figure 37S.** The Acarbose, pose 61/ positive control drug docked to 3TOP enzyme.

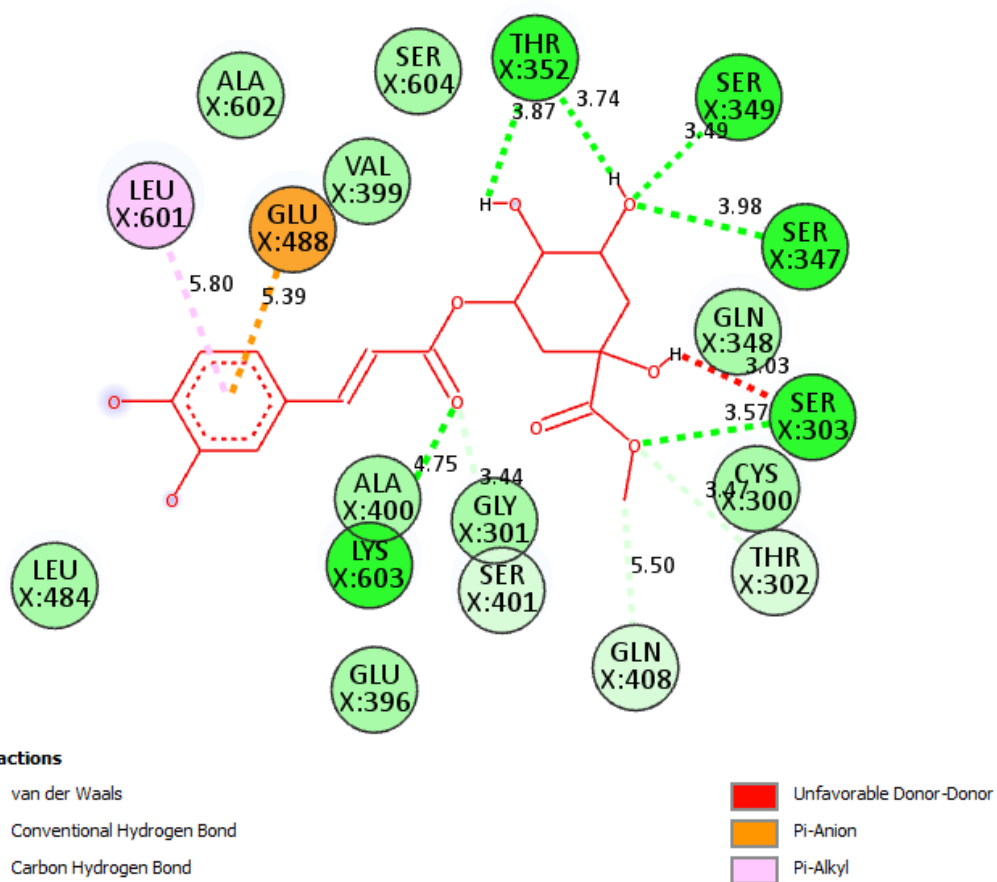

**Figure 38S.** The most important ligand interactions forming between pose 992/compound (6) and 2VF5 on one 2D diagram: good interaction.

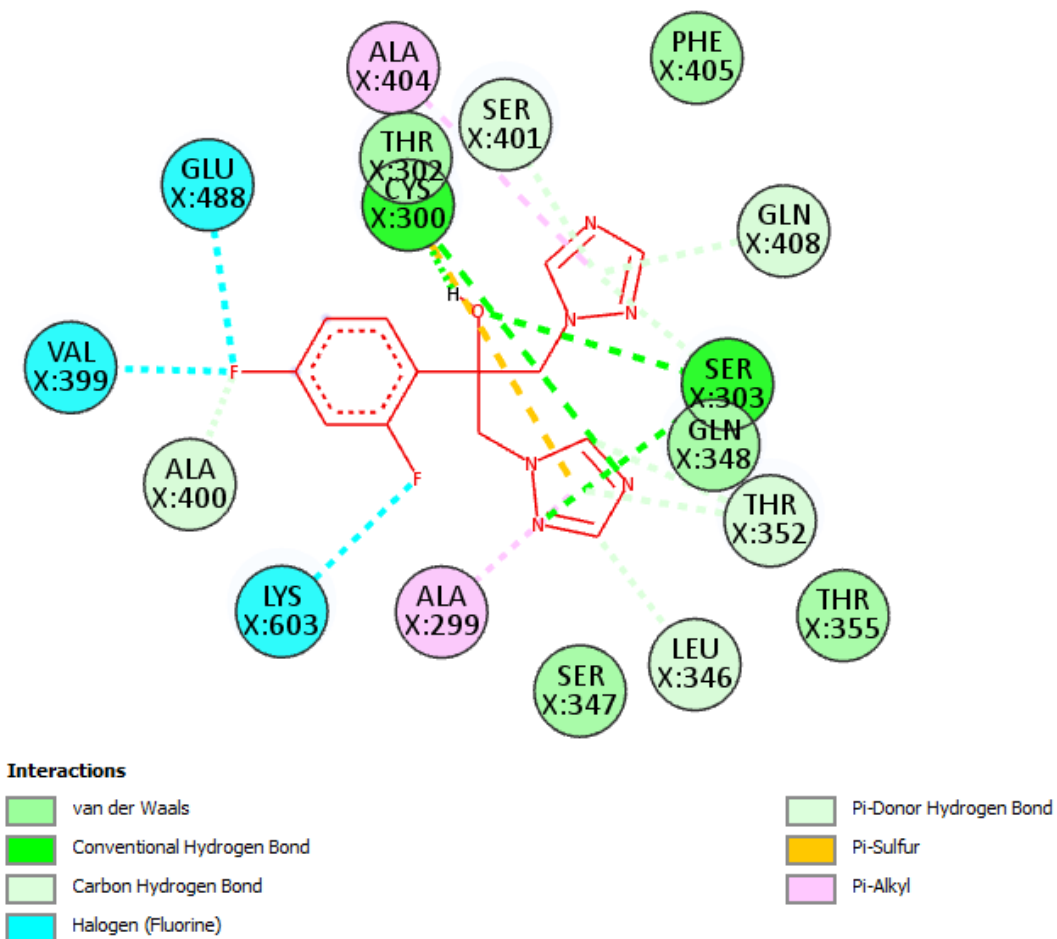

**Figure 39S.** The significant ligand interaction between pose 81 and 2VF5 enzyme on one 2D diagram.

**Table 1S.** Spectroscopic data of  $^1\text{H}$  (600 MHz) and  $^{13}\text{C}$  (150 MHz) NMR of ergosterol peroxide (**2**) and cerevisterol (**3**).

| No | ergosterol peroxide ( <b>2</b> ) <sup>a</sup> |                                          | cerevisterol ( <b>3</b> ) <sup>a</sup> |                          |
|----|-----------------------------------------------|------------------------------------------|----------------------------------------|--------------------------|
|    | $\delta_{\text{C}}$                           | $\delta_{\text{H}}$                      | $\delta_{\text{C}}$                    | $\delta_{\text{H}}$      |
| 1  | 34.7                                          | 1.93(1H, m),<br>1.68 (1H, dd, 13.8, 3.6) | 33.0                                   |                          |
| 2  | 30.1                                          | 1.50 (1H, m), 1.94 (1H,<br>m)            | 31.9                                   |                          |
| 3  | 66.4                                          | 3.99 (1H, m)                             | 67.7                                   | 4.08 (1H, m)             |
| 4  | 37.0                                          | 1.88 (1H, m), 2.10 (1H,<br>m)            | 39.5                                   |                          |
| 5  | 82.1                                          |                                          | 76.0                                   |                          |
| 6  | 135.4                                         | 6.24 (1H, d, 8.4)                        | 73.7                                   | 3.62 (brs)               |
| 7  | 130.7                                         | 6.50 (1H, d, 8.4)                        | 117.5                                  | 5.35 (1H, t, 2.4)        |
| 8  | 79.4                                          |                                          | 144.0                                  |                          |
| 9  | 51.1                                          |                                          | 43.5                                   |                          |
| 10 | 36.9                                          |                                          | 37.1                                   |                          |
| 11 | 20.6                                          |                                          | 22.0                                   |                          |
| 12 | 39.4                                          |                                          | 39.2                                   |                          |
| 13 | 44.5                                          |                                          | 43.8                                   |                          |
| 14 | 51.7                                          |                                          | 54.7                                   |                          |
| 15 | 23.4                                          |                                          | 22.7                                   |                          |
| 16 | 28.6                                          |                                          | 29.2                                   |                          |
| 17 | 56.2                                          | 1.25 (1H, m)                             | 56.0                                   |                          |
| 18 | 18.1                                          | 0.88 (3H, s)                             | 12.3                                   | 0.60 (3H, s)             |
| 19 | 12.8                                          | 0.81 (3H, s)                             | 18.4                                   | 1.08 (3H, s)             |
| 20 | 39.7                                          | 1.96 (1H, m)                             | 40.3                                   |                          |
| 21 | 20.8                                          | 0.99 (3H, d, 6.6)                        | 21.1                                   | 1.03 (3H, d, 6.6 )       |
| 22 | 135.2                                         | 5.16 (1H, d, 15.0, 8.4)                  | 135.3                                  | 5.23 (1H, dd, 15.6, 7.2) |
| 23 | 132.3                                         | 5.21 (1H, m, H-22)                       | 132.2                                  | 5.17 (1H, dd, 15.0, 7.4) |
| 24 | 42.7                                          | 1.83 (1H, m)                             | 42.5                                   |                          |
| 25 | 33.0                                          | 1.48 (1H, m)                             | 33.1                                   |                          |
| 26 | 19.8                                          | 0.82 (3H, d, 6.6)                        | 19.9                                   | 0.84 (3H, d, 7.2 )       |
| 27 | 19.9                                          | 0.83 (3H, d, 6.6)                        | 19.6                                   | 0.83 (3H, d, 6.6 )       |
| 28 | 17.5                                          | 0.91 (3H, d, 6.6)                        | 17.6                                   | 0.92 (3H, d, 7.2 )       |

$\delta$  in ppm;  $J$  in Hz;  $^a\text{CDCl}_3$

**Table 2S.** Spectroscopic data of  $^1\text{H}$  (600 MHz) and  $^{13}\text{C}$  (150 MHz) NMR of gramisterol (**4**) and caffeine (**5**).

| No | gramisterol ( <b>4</b> ) <sup>a</sup> |                            | caffeine ( <b>5</b> ) <sup>b</sup> |                              |
|----|---------------------------------------|----------------------------|------------------------------------|------------------------------|
|    | $\delta_{\text{C}}$                   | $\delta_{\text{H}}$        | $\delta_{\text{C}}$                | $\delta_{\text{H}}$          |
| 1  | 36.5                                  |                            | 27.9                               | 3.40 (s, 1-CH <sub>3</sub> ) |
| 2  | 30.9                                  |                            | 151.7                              |                              |
| 3  | 74.0                                  | 2.85 (1H, m)               | 29.7                               | 3.58 (s, 3-CH <sub>3</sub> ) |
| 4  | 39.8                                  |                            | 148.7                              |                              |
| 5  | 46.3                                  |                            | 107.6                              |                              |
| 6  | 22.4                                  |                            | 155.4                              |                              |
| 7  | 117.2                                 | 5.14 (1H, d, 4.2)          | 33.5                               | 3.99 (s, 7-CH <sub>3</sub> ) |
| 8  | 138.5                                 |                            | 141.4                              | 7.52 (1H, s)                 |
| 9  | 49.0                                  |                            |                                    |                              |
| 10 | 34.1                                  |                            |                                    |                              |
| 11 | 21.6                                  |                            |                                    |                              |
| 12 | 39.0                                  |                            |                                    |                              |
| 13 | 42.9                                  |                            |                                    |                              |
| 14 | 54.2                                  |                            |                                    |                              |
| 15 | 21.7                                  |                            |                                    |                              |
| 16 | 28.9                                  |                            |                                    |                              |
| 17 | 55.3                                  |                            |                                    |                              |
| 18 | 11.6                                  | 0.54 (3H, s)               |                                    |                              |
| 19 | 13.9                                  | 0.75 (3H, s)               |                                    |                              |
| 20 | 35.4                                  |                            |                                    |                              |
| 21 | 18.6                                  | 0.89 (3H, d, 6.6)          |                                    |                              |
| 22 | 34.3                                  |                            |                                    |                              |
| 23 | 30.4                                  |                            |                                    |                              |
| 24 | 155.7                                 |                            |                                    |                              |
| 25 | 33.0                                  |                            |                                    |                              |
| 26 | 20.8                                  | 0.97 (3H, d, 6.6)          |                                    |                              |
| 27 | 21.7                                  | 0.98 (3H, d, 6.6)          |                                    |                              |
| 28 | 106.4                                 | 4.70 (1H, s); 4.64 (1H, s) |                                    |                              |
| 29 | 15.3                                  | 0.93 (3H, d, 6.6)          |                                    |                              |

$\delta$  in ppm;  $J$  in Hz; <sup>a</sup> CDCl<sub>3</sub>, <sup>b</sup> DMSO-*d*<sub>6</sub>



**Table 3S.** Spectroscopic data of  $^1\text{H}$  (600 MHz) and  $^{13}\text{C}$  (150 MHz) NMR of methyl 5-*O*-caffeoylquininate (**6**) and chlorogenic acid (**7**).

| No               | methyl 5- <i>O</i> -caffeoylquininate ( <b>6</b> ) <sup>a</sup> |                                        | chlorogenic acid ( <b>7</b> ) <sup>a</sup> |                                                    |
|------------------|-----------------------------------------------------------------|----------------------------------------|--------------------------------------------|----------------------------------------------------|
|                  | $\delta_{\text{C}}$                                             | $\delta_{\text{H}}$                    | $\delta_{\text{C}}$                        | $\delta_{\text{H}}$                                |
| 1                | 73.0                                                            | -                                      | 73.5                                       | -                                                  |
| 2                | 37.2                                                            | 2.13 (1H; m; H2a)<br>1.79 (1H; m; H2b) | 37.2                                       | 2.04 (1H; m; H2a)<br>1.81 (1H; dd; 13.2; 7.8; H2b) |
| 3                | 66.9                                                            | 3.88 (1H; m)                           | 68.1                                       | 3.93 (1H; d; 2.4)                                  |
| 4                | 69.3                                                            | 3.62 (1H; m)                           | 70.4                                       | 3.55-3.58 (1H; m)                                  |
| 5                | 71.0                                                            | 5.02 (1H; m)<br>2.13 (1H; m; H6a)      | 70.8                                       | 5.06-5.09 (1H; m)<br>2.04 (1H; m; H6a)             |
| 6                | 35.1                                                            | 1.92 (1H; dd; 13.2; 3.0; H6b)          | 36.3                                       | 1.96 (1H; dd; 13.2; 3.6; H6b)                      |
| 7                | 173.6                                                           | -                                      | 174.9                                      | -                                                  |
| 1'               | 125.1                                                           | -                                      | 125.6                                      | -                                                  |
| 2'               | 114.4                                                           | 7.02 (1H; s)                           | 114.7                                      | 7.04 (1H; d; 1.8)                                  |
| 3'               | 145.8                                                           | -                                      | 144.9                                      | -                                                  |
| 4'               | 148.9                                                           | -                                      | 148.3                                      | -                                                  |
| 5'               | 115.8                                                           | 6.76 (1H; d; 6.6)                      | 115.7                                      | 6.78 (1H; d; 8.4)                                  |
| 6'               | 121.4                                                           | 6.97 (1H; d; 7.2)                      | 121.3                                      | 6.99 (1H; dd; 8.4; 1.8)                            |
| 7'               | 145.2                                                           | 7.39 (1H; d; 15.6)                     | 145.5                                      | 7.43 (1H; d; 15.6)                                 |
| 8'               | 113.6                                                           | 6.11 (1H; d; 15.6)                     | 114.3                                      | 6.16 (1H; d; 16.2)                                 |
| 9'               | 165.4                                                           | -                                      | 165.7                                      | -                                                  |
| OCH <sub>3</sub> | 51.8                                                            | 3.56 (3H, s)                           |                                            |                                                    |

$\delta$  in ppm;  $J$  in Hz.; <sup>a</sup> DMSO-*d*<sub>6</sub>

**Table 4S.** The significant docking results of compound (1-7), and Acarbose (postive control) have been docked to **3TOP**: enzyme to explain and analyze the significant interaction results in the ligand interaction model

| Entry    | Pose <sup>[a]</sup> | Free Gibbs energy <sup>[b]</sup> | K <sub>i</sub> <sup>[c]</sup> | The number of Hydrogen <sup>[d]</sup> | The character and bond length <sup>[e]</sup>                                                                                                                                                                                                                                                                                                                                                            |
|----------|---------------------|----------------------------------|-------------------------------|---------------------------------------|---------------------------------------------------------------------------------------------------------------------------------------------------------------------------------------------------------------------------------------------------------------------------------------------------------------------------------------------------------------------------------------------------------|
| Comp 7   | 235                 | -4.98                            | 224.1                         | 8                                     | A:Lys 1088:N – Pose 235:O (2.80 Å); A:Gln1109:N - Pose 235:O (3.06 Å); B:Thr 1103:O - Pose 235:O (2.71 Å); Pose 235:H - Glu1095:O (1.71 Å); Pose 235:H - B:Glu 1095:O (2.08 Å); Pose 235:H - B:Thr1103:O (2.05 Å); Pose 235:H - A:Gln 1109:O; (2.17 Å); Pose 235:H - A:Asn 1090:O (2.17 Å)                                                                                                              |
| Comp 3   | 119                 | -8.84                            | 0.330                         | 4                                     | B:Thr 1101:O – Pose 119:O (3.12 Å); B:Gly 1102:N – Pose 119:O (3.07 Å); B:Thr 1103:N – Pose 119:O (3.13 Å); Pose 119:H - A:Asn 1090:O (2.34 Å)                                                                                                                                                                                                                                                          |
| Acarbose | 61                  | -8.81                            | 0.35                          | 0                                     |                                                                                                                                                                                                                                                                                                                                                                                                         |
| Comp 6   | 394                 | -5.38                            | 114.0                         | 11                                    | A:Lys 1088:N – Pose 394:O (3.12Å ); A:Lys 1088:N - Pose 394:O (2.85 Å); B:Ile 1104:N – Pose 394:O (2.88 Å); Pose 394:H - A:Gln 1109:O (2.25 Å); Pose 394:H - A:Glu 1095:O (1.80 Å); Pose 394:H - A:Glu 1095:O (2.05 Å); Pose 394:H - A:Gln 1109:O (1.74 Å); Pose 395:H - A:Gln 1109:O (3.25 Å); Pose 394:H - A:Glu 1095:O (1.80 Å); Pose 394:H - A:Glu 1095:O (2.05); Pose 394:H - A:Asp 1107:O (2.03Å) |
| Comp 1   | 491                 | -8.43                            | 0.657                         | 0                                     | No hydrogen bonding                                                                                                                                                                                                                                                                                                                                                                                     |
| Comp 4   | 237                 | -9.49                            | 0.11                          | 01                                    | Pose 237:H - A:Asn 1090:O (2.22 Å)                                                                                                                                                                                                                                                                                                                                                                      |
| Comp 2   | 155                 | -8.71                            | 0.412                         | 01                                    | Pose 155: H - B:Gln 1109:O (1.96 Å)                                                                                                                                                                                                                                                                                                                                                                     |
| Comp 5   | 355                 | -4.59                            | 429.8                         |                                       | No hydrogen bonding                                                                                                                                                                                                                                                                                                                                                                                     |

**Table 5S.** The significant docking results of compound (1-7) to 2VF5 enzyme: PDB have been presented the significant interaction results and analyzed the ligand interaction model.

| Entry       | Pose [a] | Free Gibbs energy [b] | K <sub>i</sub> [c] | The number of hydrogen [d] | The character and bond length[e]                                                                                                                                                                                                                                                                                                                                                                                                    | Explanation: Good/bad interaction in ligand interaction model |
|-------------|----------|-----------------------|--------------------|----------------------------|-------------------------------------------------------------------------------------------------------------------------------------------------------------------------------------------------------------------------------------------------------------------------------------------------------------------------------------------------------------------------------------------------------------------------------------|---------------------------------------------------------------|
| Comp 7      | 49       | -5.25                 | 140                | 8                          | X:Ser 303:O – Pose 49:O (2.51 Å); X:Gln 348:N – Pose 49:O (2.63 Å); X:Ala 602:N – Pose 49:O (2.82 Å); Pose 49:H - X:Ser 303:O (2.11 Å); Pose 49: H - X:Leu 346:O (2.23 Å); Pose 49:H - X:Glu 488:O (1.79 Å); Pose 49:H - X:Glu 488:O (2.30 Å); Pose 49:H - X: Ala 602:O (2.10 Å).                                                                                                                                                   | Good interaction                                              |
| Comp 6      | 992      | -6.81                 | 10.26              | 12                         | X:Ser303:N - :Pose 992:O (2.97Å); X:Ser 303:N - Pose 992:O (2.93 Å); X:Ser 303:OG - Pose 992:O (2.87 Å); X:Ser 303:OG - Pose 992:O (2.87 Å); X:Ser 347:O - Pose 992:O (2.80 Å); X:Ser 349:N - Pose 992:O (3.17 Å); X:Ser 349:O - Pose 992:O (2.58 Å); X:Thr 352:O - Pose 992:O (2.74 Å); X:Thr 352:O - Pose 992:O (2.92 Å); Pose 992:H - X:Thr 352:O (2.12 Å); Pose 992:H - X:Ser 349:O (2.39 Å); Pose 992:H - X:Thr 352:O (2.06 Å) | Good interaction                                              |
| Fluconazole | 81       | -5.74                 | 61.85              | 6                          | X:Cys 300:N – Pose 81:N (3.11 Å); X:Ser 303:N – Pose 81:O (2.97 Å); Ser 303:O – Pose 81:N (2.71 Å); X:Ser 303:O - :LIG1:O (2.75 Å); X:Ser 401:O – Pose 81:N (2.86 Å); Pose 81:H - X:Cys 300:O (2.26 Å)                                                                                                                                                                                                                              | Good interaction                                              |

| Entry  | Pose<br>[a] | Free<br>Gibbs<br>energy<br>[b] | $K_i$ [c] | The<br>number of<br>hydrogen [d] | The character and bond<br>length[e]                                                                                    | Explanation:<br>Good/bad interaction<br>in ligand interaction<br>model                                                                                                                                                                                                                              |
|--------|-------------|--------------------------------|-----------|----------------------------------|------------------------------------------------------------------------------------------------------------------------|-----------------------------------------------------------------------------------------------------------------------------------------------------------------------------------------------------------------------------------------------------------------------------------------------------|
| Comp 1 | 720         | -9.96                          | 0.05      | 1                                | Pose 720:H - X:Glu 488:O<br>(1.98 Å)                                                                                   | Not full interactions:<br>Functional group: 01<br>hydrogen bonding,<br>Glu 488 to hydrogen<br>atom of hydroxyl<br>alcohol; Capping<br>group (CA): no;<br>Connecting unit (CU):<br>01 alkyl interaction<br>from Ala 299 to<br>carbon methyl.                                                         |
| Comp 2 | 329         | -10.43                         | 0.023     | 3                                | X:Thr 302:N – Pose 329:O<br>(2.72 Å);<br>X:Gln 348:N – Pose<br>329:O (2.67 Å);<br>X:Ser 347:O – Pose 329:O<br>(3.06 Å) | Bad interaction: 01<br>unfavorable donor-<br>donor from Gln 348<br>to hydrogen atom of<br>hydroxyl alcohol;<br>(red color)                                                                                                                                                                          |
| Comp 3 | 830         | -10.17                         | 0.035     | 3                                | X:Gly 301:N – Pose<br>930:O (2.88 Å);<br>X:Asn 305:N – Pose<br>930:O (3.13 Å);<br>X:Asn 305:N – Pose<br>930:O (1.99 Å) | Not full interactions:<br>Functional group: 02<br>hydrogen bondings:<br>Glu 488 to hydrogen<br>atom of alcohol<br>group; Ala 602 to<br>hydrogen atom of<br>alcohol group;<br>Capping group (CA):<br>01 pi-alkyl from Leu<br>601 to cyclohexyl<br>group on pose 830;<br>Connecting unit (CU):<br>no. |
| Comp 4 | 973         | -10.44                         | 0.022     | 0                                | -                                                                                                                      | Not full interactions:<br>Functional group: no;<br>Capping group (CA):<br>01 alkyl interaction<br>from Leu 601 to<br>cyclohexyl group;<br>Connecting unit (CU):<br>No                                                                                                                               |

| Entry  | Pose<br>[a] | Free<br>Gibbs<br>energy<br>[b] | $K_i$ [c] | The<br>number of<br>hydrogen [d] | The character and bond<br>length[e]                                                                                                                                                                          | Explanation:<br>Good/bad interaction<br>in ligand interaction<br>model                                                                                                                                                                                                                                                                                  |
|--------|-------------|--------------------------------|-----------|----------------------------------|--------------------------------------------------------------------------------------------------------------------------------------------------------------------------------------------------------------|---------------------------------------------------------------------------------------------------------------------------------------------------------------------------------------------------------------------------------------------------------------------------------------------------------------------------------------------------------|
| Comp 5 | 177         | -4.72                          | 348       | 5                                | <p>X:Ser 303:N – Pose 177:N (2.97 Å);</p> <p>X:Ser 303:OG - Pose 177:N (3.08 Å);</p> <p>X:Ser 349:O - :LIG1:O (2.60 Å)</p> <p>X:Thr 352:O – Pose 177:O (3.01 Å)</p> <p>X:Lys 603:N – Pose 177:O (3.20 Å)</p> | <p>Not full interactions:</p> <p>Functional group: O3 hydrogen bondings from Ser 349 and Thr 352 to oxygen atom of carbonyl group and Ser 303 to nitrogen atom on pose;</p> <p>Capping group (CA): no; Connecting unit (CU): O3 carbon hydrogen bond interactions from Cys and Ser 303 to methyl group and Lys 603 to another methyl group on pose.</p> |
